# Supplementary material for: Unveiling a Microexon Switch: Novel Regulation of the Activities of Sugar Assimilation and Plant-Cell-Wall-Degrading Xylanases and Cellulases by Xlr2 in Trichoderma virens
Source: MDPI journal article supplement (doi:10.3390/ijms25105172), 2024-05-09
Supplement: s1 [file s1]

|              |                                                               |                                                                                                |    |    |    |    |    |    |    |     |     |     |     |     |
|--------------|---------------------------------------------------------------|------------------------------------------------------------------------------------------------|----|----|----|----|----|----|----|-----|-----|-----|-----|-----|
|              | 10                                                            | 20                                                                                             | 30 | 40 | 50 | 60 | 70 | 80 | 90 | 100 | 110 | 120 | 130 | 140 |
|              | *                                                             | *                                                                                              | *  | *  | *  | *  | *  | *  | *  | *   | *   | *   | *   | *   |
| Xlr2         | ATGGCAGCTGAAGCCGACGGTCAAGAACGGGATCGCCCTGAGCCTCTCGTCGCGTC      | -ATTG-ATGCAGCGCAGCGAGACGCCGACACGGAGCACGCCCGACCGCGAAAAACGGACCCGTAGGGCTTGTGACAAGTGCAGCGCCTCGAGGA |    |    |    |    |    |    |    |     |     |     |     |     |
| Xlr2-000202  | ATGGCAGCTGAAGCCGACGGTCAAGAACGGGATCGCCCTGAGCCTCTCGTCGCGTC      | -ATTG-ATGCAGCGCAGCGAGACGCCGACACGGAGCACGCCCGACCGCGAAAAACGGACCCGTAGGGCTTGTGACAAGTGCAGCGCCTCGAGGA |    |    |    |    |    |    |    |     |     |     |     |     |
| TAS_375582   | ATGGCAACCGAAGCCGACGGTGAACAGCGGGATCGCCCTCAGCCTCTGGTCGCGTCTGGCC | -ATG-ACCGCGGGCTCAACGCCGATGCGGAGCACGCCAGGCCTCGGAAGCGCACCCGAAGAGCGTGCGACAAGTGCAGCGCCTCGAGGA      |    |    |    |    |    |    |    |     |     |     |     |     |
| TA_229644    | ATGGCTACCGAAGCCGACGGTGAAGAGCGGCATCGCCCTCAGCCTCTCGTCGCGTCTGGCC | -ATG-ACCGCGGGGGCCACGCCGATGCGGAGCACGCCCGGCCTCGGAAGCGCACCCGGAGAGCGTGCGACAAGTGCAGCGCCTCGAGGA      |    |    |    |    |    |    |    |     |     |     |     |     |
| TLONGI_14376 | ATGGCAGCTGAAGCCGACGGTCAAGAGCGGCACCGCCCGAGCCTCTTGTCGCGCC       | -GTTG-GCGCAGCGCAGCGAGACGCCGATACGGAGCACGCCCGGCCGAGGAAGCGGACCCGGAGGGCTTGCGACAAGTGCAGCGCCTCCAGGA  |    |    |    |    |    |    |    |     |     |     |     |     |
| TR_60282     | ATGGCAGCTGAAGCCGACGGCCAAGAGCGGGATCGCCCGAGCCTCTTGTCGGCTC       | -ATTG-GCGCAGCATAGCGAGACGCCGATACGGAGCACGCCCGGCCGAGGAAGCGGACCCGGAGGGCTTGCGACAAGTGCAGCGCCTCAAGGA  |    |    |    |    |    |    |    |     |     |     |     |     |
| TRICITRO_110 | ATGGCAGCCGAAGCCGACGGTCAAGAGCGGCATCGCCGCGGTTCTCTTGTCGCGTC      | -AGTG-ACGCAGCGCAGTGAGACGCCGACACGGAGCACGCCCGGCCGAGGAAGCGGACCCGGAGGGCTTGCGACAAGTGCAGCGCCTCGAGGA  |    |    |    |    |    |    |    |     |     |     |     |     |
| THZ_79686    | ATGGCAGCCGAAGCCGACGGTCAAGAACGGGATCGCCCTGAGCCTCTCGTCGCGTC      | -ATTG-ATGCACCCGACGCGAAACGCCAGACACGGAGCACGCCCGCCACGGAACGGACCCGTAGGGCTTGTGATAAAGTGCAGTGCCTCGAGGA |    |    |    |    |    |    |    |     |     |     |     |     |
| TH_701679    | ATGGCAGCCGAAGCCGACGGTCAAGAACGGGATCGCCCTGAGCCTCTCGTCGCGTC      | -ATTG-ATGCACCCGACGCGAAACGCCAGACACGGAGCACGCCCGCCACGGAACGGACCCGTAGGGCTTGTGATAAAGTGCAGTGCCTCGAGGA |    |    |    |    |    |    |    |     |     |     |     |     |
| A0A1T3C8Z2   | ATGGCAGCCGAAGCCGACGGTCAAGAACGGGATCGCCCTGAGCCTCTCGTCGCGTC      | -ATTG-ATGCACCCGACGCGAAACGCCAGACACGGAGCACGCCCGCCACGGAACGGACCCGTAGGGCTTGTGATAAAGTGCAGTGCCTCGAGGA |    |    |    |    |    |    |    |     |     |     |     |     |
| TGAM_8287    | ATGGCAACCGAAGCCGACGGTGAACAGCGGGATCGCCCTCAGCCTCTCGTCGCGTC      | -TGAGCATG-ACCGCGGGTCGACACCCGATGCGGAGCACGCCCGGCCCGGAAGCGCACCCGGAGAGCGTGCGACAAGTGCAGCGCCTCGAGGA  |    |    |    |    |    |    |    |     |     |     |     |     |
| OPB37586     | ATGGCAGCCGAAGCCGACGGTCAAGAACGGGATCGCCCTGAGCCTCTCGTCGCGTC      | -ATTG-ATGCACCCGACGCGAAACGCCAGACACGGAGCACGCCCGCCACGGAACGGACCCGTAGGGCTTGTGATAAAGTGCAGTGCCTCGAGGA |    |    |    |    |    |    |    |     |     |     |     |     |
| cDNA OPB3758 | ATGGCAGCCGAAGCCGACGGTCAAGAACGGGATCGCCCTGAGCCTCTCGTCGCGTC      | -ATTG-ATGCACCCGACGCGAAACGCCAGACACGGAGCACGCCCGCCACGGAACGGACCCGTAGGGCTTGTGATAAAGTGCAGTGCCTCGAGGA |    |    |    |    |    |    |    |     |     |     |     |     |
| cDNA Xlr2*   | ATGGCAGCTGAAGCCGACGGTCAAGAACGGGATCGCCCTGAGCCTCTCGTCGCGTC      | -ATTG-ATGCAGCGCAGCGAGACGCCGACACGGAGCACGCCCGACCGCGAAAAACGGACCCGTAGGGCTTGTGACAAGTGCAGCGCCTCGAGGA |    |    |    |    |    |    |    |     |     |     |     |     |

|              |                       |                |                              |                                                 |                                       |                           |            |                     |            |            |            |            |
|--------------|-----------------------|----------------|------------------------------|-------------------------------------------------|---------------------------------------|---------------------------|------------|---------------------|------------|------------|------------|------------|
|              | 150                   | 160            | 170                          | 180                                             | 190                                   | 200                       | 210        | 220                 | 230        |            |            |            |
|              | *                     | *              | *                            | *                                               | *                                     | *                         | *          | *                   | *          |            |            |            |
| Xlr2         | CACGATGCGATGGAGAATG   | TGAGT----      | CT----                       | GATACTACAGCCAACCGGTGGCTC----                    | GTTATCGT-GATATCT-----                 | GAA-C-----                | TG-----    | ACTGA----           | GATA----   | T-----     | C--TG--CGC |            |
| Xlr2-000202  | CACGATGCGATGGAGAATG   | TGAGT----      | CT----                       | GATACTACAGCCAGCCGGTGGCTC----                    | GTTATCGT-GATATCT-----                 | GAA-C-----                | TG-----    | ACTGA----           | GATA----   | T-----     | C--TG--CGC |            |
| TAS_375582   | CTCGTTGTGATGGAGAATAGT | GAGT----       | CT-----                      | CTCGTGCCAGGTGTTGAGTG----                        | GCGTTGGTTGATTGATGATTTCATGTGCAACC----- | TG-----                   | ACTGACT--  | GATACAAAT-----      | CA-TA--    | CGT        |            |            |
| TA_229644    | CTCGCTGTGATGGAGAATAGT | GAGT----       | CTC----                      | TCTCTCTCTCATACGATCTCTC----                      | A-GATC-T-GAGATGT-----                 | TAC-CCATGCGGGCGTTGTG----- | ATTGA----  | CTAA----            | C-----     | A--CG--CGT |            |            |
| TLONGI_14376 | CGCGCTGCGATGGCGAGTGGT | GAGTTTTGCT---- | GGT-CCACGGCCTGCATGTCAGT----- | TGAT-GATGT-----                                 | C-----                                | TA-----                   | ACCGA----  | GACG----            | T-----     | G--TG--TGT |            |            |
| TR_60282     | CGCGGTGCGATGGCGAGTGGT | GAGT-----      | T----                        | GGGA-----                                       | CGGTTTCATG-----                       | GTT-TCTG-CATATCA-----     | GTG-A----- | TGGTGTCTAACC GG---- | GACA----   | T-----     | TTGTG--CGC |            |
| TRICITRO_110 | CGCGGTGCGATGGCGAGTGGT | GAGT-----      | T-----                       | TGTGCCGTTCCACGGGTTCTGCAGATGAAGTCAT-GATGTCT----- | A-----                                | ACTGA----                 | GACA----   | T-----              | G--TG--CGC |            |            |            |
| THZ_79686    | CGCGATGCGATGGAGAATGGT | AAGT----       | CT----                       | GAT-GTTGTGGC--TGG--AGCTC----                    | CTCATCGT----                          | TGAT-----                 | AT-C-----  | TG-----             | ACTGA----  | GATT----   | T-----     | G--TG--CCC |
| TH_701679    | CGCGATGCGATGGAGAATGGT | AAGT----       | CT----                       | GAT-GTTGTGGC--TGG--AGCTC----                    | CTCATCGT----                          | TGAT-----                 | AT-C-----  | TG-----             | ACTGA----  | GATT----   | T-----     | G--TG--CCC |
| A0A1T3C8Z2   | CGCGATGCGATGGAGAATGGT | AAGT----       | CT----                       | GATGCT--GC--GGCTGAAGCTC----                     | CTCATCGT----                          | TGAT-----                 | AT-C-----  | TG-----             | ACTGA----  | GATT----   | T-----     | G--TG--CCC |
| TGAM_8287    | CTCGCTGTGACGGAGAATAGT | GAGT----       | CTCTCTGTCTCTTTCTCATCCCGAT--  | CTC----                                         | TAAGATCT-GAGATCT-----                 | TAT-C-----                | CG-----    | TATGGCGTTGATA----   | TGATTGAC-- | TGACACGC   |            |            |
| OPB37586     | CGCGATGCGATGGAGAATGGT | AAGT----       | CT----                       | GATGCT--GC--GGCTGAAGCTC----                     | CTCATCGT----                          | TGAT-----                 | AT-C-----  | TG-----             | ACTGA----  | GATT----   | T-----     | G--TG--CCC |
| cDNA OPB3758 | CGCGATGCGATGGAGAATG   |                |                              |                                                 |                                       |                           |            |                     |            |            |            |            |
| cDNA Xlr2*   | CACGATGCGATGGAGAATG   |                |                              |                                                 |                                       |                           |            |                     |            |            |            |            |

Intron 1

|              |                                                             |                                            |              |                                                      |                      |
|--------------|-------------------------------------------------------------|--------------------------------------------|--------------|------------------------------------------------------|----------------------|
|              | 240                                                         | 250                                        | 260          | 270                                                  | 280                  |
|              | *                                                           | *                                          | *            | *                                                    | *                    |
| Xlr2         | GTCTCC--AGTCCTTGTCGTCGTTGTGAAGTAAGC-----                    | T----                                      | A-GCT-----   | TCGATT-----                                          | G-----GGGTC          |
| Xlr2-000202  | GTCTCC--AGTCCTTGTCGTCGTTGTGAAGTAAGC-----                    | T----                                      | A-GCT-----   | TCGATT-----                                          | CCTATTCTG-AATTGGGGTC |
| TAS_375582   | GTTAAA--AGTCCCTGTCGTCGTTGCGAAGTAAGCAAAGTCTAAATCCTAACACT---- | A-TCTCTCACTACCATCTCCCGTGGGATCCTTCTATT----- | GTTCCCGGGGGC |                                                      |                      |
| TA_229644    | GTGAAT--AGTCCCTGTCGTCGTTGCGAAGTAAGCAAAGCCTAAATCC-----       | T----                                      | A-CCA-----   | TCTCTTACTACCAGGAATCTCTCGTGAGATCCTTCAATCGTTCCCGG----- | GGCTC                |
| TLONGI_14376 | GT---C--AGTCCTTGTCGACGTTGTGAAGTAAGCAGCATG-----              | T----                                      | C-TCA-----   | TTCATT-----                                          | G-----TCTAC          |
| TR_60282     | GT---C--AGTCCTTGTCGTCGTTGCGAAGTAAGCACCATG-----              | T----                                      | C-TCT-----   | TCCATT-----                                          | T-----GTCCT          |
| TRICITRO_110 | G-CGTC--AGTCCTTGCCGTCGTTGTGAAGTAAGC-----                    | A-GCA-----                                 | GCTCTT-----  | G-----TCTCT                                          |                      |
| THZ_79686    | GCGTGC--AGTCCTTGTCGCCGTTGTGAAGTAAGC-----                    | TCAATAA-GCA-----                           | GCTGTT-----  | T-----CTATT                                          |                      |
| TH_701679    | GCGTGC--AGTCCTTGTCGCCGTTGTGAAGTAAGC-----                    | TCAATAA-GCA-----                           | GCTGTT-----  | T-----CTATT                                          |                      |
| A0A1T3C8Z2   | GCGTGC--AGTCCTTGTCGCCGTTGTGAAGTAAGC-----                    | T----                                      | AAGCA-----   | GCTGTT-----                                          | T-----CTGTT          |
| TGAM_8287    | GTGTCAATAGTCCCTGTCGTCGTTGCGAAGTAAGCAAAGTCTAAATCC-----       | T----                                      | A-CCA-----   | TCTCTACTACCAGGTATCTCGCGAGATCCTTCAATGGTTCCC--         | G-----GGCTC          |
| OPB37586     | GCGTGC--AGTCCTTGTCGCCGTTGTGAAGTAAGC-----                    | T----                                      | AAGCA-----   | GCTGTT-----                                          | T-----CTGTT          |
| cDNA OPB3758 | -----TCCTTGTCGCCGTTGTGAAG-----                              |                                            |              |                                                      |                      |
| cDNA Xlr2*   | -----TCCTTGTCGTCGTTGTGAAG-----                              |                                            |              |                                                      |                      |

Intron 1

Microexon

Intron 2







|              |      |      |      |      |      |      |      |      |      |      |      |      |      |
|--------------|------|------|------|------|------|------|------|------|------|------|------|------|------|
|              | 1350 | 1360 | 1370 | 1380 | 1390 | 1400 | 1410 | 1420 | 1430 | 1440 | 1450 | 1460 | 1470 |
|              | *    | *    | *    | *    | *    | *    | *    | *    | *    | *    | *    | *    | *    |
| Xlr2         | G    | A    | C    | T    | G    | C    | T    | G    | A    | T    | G    | T    | C    |
| Xlr2-000202  | G    | A    | C    | T    | G    | C    | T    | G    | A    | T    | G    | T    | C    |
| TAS_375582   | A    | A    | C    | T    | G    | C    | C    | G    | T    | A    | C    | G    | A    |
| TA_229644    | A    | A    | C    | T    | G    | C    | T    | G    | A    | T    | G    | T    | C    |
| TLONGI_14376 | G    | A    | C    | T    | G    | C    | C    | G    | G    | C    | T    | C    | A    |
| TR_60282     | G    | A    | C    | T    | G    | C    | C    | G    | G    | C    | T    | C    | A    |
| TRICITRO_110 | G    | A    | C    | T    | G    | A    | T    | G    | C    | T    | G    | C    | A    |
| THZ_79686    | G    | A    | C    | T    | G    | C    | C    | G    | G    | C    | T    | C    | A    |
| TH_701679    | G    | A    | C    | T    | G    | C    | C    | G    | G    | C    | T    | C    | A    |
| A0A1T3C8Z2   | G    | A    | C    | T    | G    | C    | T    | G    | A    | T    | G    | T    | C    |
| TGAM_8287    | A    | A    | C    | T    | G    | C    | T    | G    | A    | T    | G    | T    | C    |
| OPB37586     | G    | A    | C    | T    | G    | C    | T    | G    | A    | T    | G    | T    | C    |
| cDNA OPB3758 | G    | A    | C    | T    | G    | C    | T    | G    | A    | T    | G    | T    | C    |
| cDNA Xlr2*   | G    | A    | C    | T    | G    | C    | T    | G    | A    | T    | G    | T    | C    |

Intron 3

|              |      |      |      |      |      |      |      |      |      |      |
|--------------|------|------|------|------|------|------|------|------|------|------|
|              | 1480 | 1490 | 1500 | 1510 | 1520 | 1530 | 1540 | 1550 | 1560 | 1570 |
|              | *    | *    | *    | *    | *    | *    | *    | *    | *    | *    |
| Xlr2         | -    | C    | C    | A    | T    | T    | A    | -    | -    | -    |
| Xlr2-000202  | -    | C    | C    | A    | T    | T    | A    | -    | -    | -    |
| TAS_375582   | -    | T    | C    | G    | T    | T    | A    | -    | -    | -    |
| TA_229644    | T    | C    | T    | G    | T    | A    | -    | -    | -    | -    |
| TLONGI_14376 | -    | G    | A    | C    | T    | G    | A    | -    | -    | -    |
| TR_60282     | -    | A    | T    | T    | G    | T    | A    | -    | -    | -    |
| TRICITRO_110 | -    | T    | G    | C    | -    | -    | -    | -    | -    | -    |
| THZ_79686    | -    | C    | C    | A    | T    | T    | A    | -    | -    | -    |
| TH_701679    | -    | C    | C    | A    | T    | T    | A    | -    | -    | -    |
| A0A1T3C8Z2   | -    | C    | C    | A    | T    | T    | A    | -    | -    | -    |
| TGAM_8287    | -    | T    | C    | A    | A    | C    | T    | -    | -    | -    |
| OPB37586     | -    | C    | C    | A    | T    | T    | A    | -    | -    | -    |
| cDNA OPB3758 | -    | -    | -    | -    | -    | -    | -    | -    | -    | -    |
| cDNA Xlr2*   | -    | -    | -    | -    | -    | -    | -    | -    | -    | -    |

Intron 3

|              |      |      |      |      |      |      |      |      |      |      |      |      |      |      |      |
|--------------|------|------|------|------|------|------|------|------|------|------|------|------|------|------|------|
|              | 1580 | 1590 | 1600 | 1610 | 1620 | 1630 | 1640 | 1650 | 1660 | 1670 | 1680 | 1690 | 1700 | 1710 | 1720 |
|              | *    | *    | *    | *    | *    | *    | *    | *    | *    | *    | *    | *    | *    | *    | *    |
| Xlr2         | C    | C    | G    | A    | A    | A    | C    | C    | A    | C    | G    | G    | T    | G    | A    |
| Xlr2-000202  | C    | C    | G    | A    | A    | A    | C    | C    | A    | C    | G    | G    | T    | G    | A    |
| TAS_375582   | C    | C    | C    | A    | A    | A    | C    | T    | A    | A    | T    | C    | A    | A    | T    |
| TA_229644    | C    | C    | G    | A    | A    | A    | C    | T    | A    | A    | T    | C    | A    | A    | T    |
| TLONGI_14376 | C    | C    | A    | A    | A    | C    | A    | C    | G    | G    | T    | G    | A    | A    | T    |
| TR_60282     | C    | C    | A    | A    | A    | C    | A    | C    | G    | G    | T    | G    | A    | A    | T    |
| TRICITRO_110 | C    | C    | G    | A    | A    | A    | C    | A    | C    | G    | G    | T    | G    | A    | T    |
| THZ_79686    | C    | C    | A    | A    | A    | C    | A    | C    | G    | G    | T    | G    | A    | A    | T    |
| TH_701679    | C    | C    | A    | A    | A    | C    | A    | C    | G    | G    | T    | G    | A    | A    | T    |
| A0A1T3C8Z2   | C    | C    | A    | A    | A    | C    | A    | C    | G    | G    | T    | G    | A    | A    | T    |
| TGAM_8287    | C    | C    | G    | A    | A    | A    | C    | T    | A    | A    | T    | C    | A    | A    | T    |
| OPB37586     | C    | C    | A    | A    | A    | C    | T    | A    | A    | T    | C    | A    | A    | T    | C    |
| cDNA OPB3758 | C    | C    | A    | A    | A    | C    | T    | A    | A    | T    | C    | A    | A    | T    | C    |
| cDNA Xlr2*   | C    | C    | G    | A    | A    | A    | C    | T    | A    | A    | T    | C    | A    | A    | T    |

173017401750176017701780179018001810182018301840185018601870

\*

\*

\*

\*

\*

\*

\*

\*

\*

\*

\*

\*

\*

\*

Xlr2

CTCAATCGAGAGGATGAACAATGTGCCGGACCTGTGACACCATGTGCAAACCCCCTTTGCTCGTGCAAAAAGGACCAAGATGGCAGCATATACAATATGGAGTTACGGGAAGAACGCCGGAGAGTCTTTTGGCTGCTCTACGCCTTGGAT

Xlr2-000202

CTCAATCGAGAGGATGAGCAATGTGCCGGACCTGTGACGCCATGTGCAAACCCC-TTTGCTCGTGCAAAAAGGACCAAGATGGCAGCATATACAATATGGAGTTGCGGGAAGAACGCCGGAGAGTCTTTTGGCTGCTCTACGCCTTGGAT

TAS\_375582

CTCAATCGAGAAGACGAGCAGTGTGCTGGACCTGTAACTCCATGCGCAAATCCCCTCTGCTCATGTGCGAAAAGGAGCAGGACGGCAGCTTATACAATCTCGAGCATCGAGAGGAACGCCGGAGAGTCTTTTGGCTTCTCTACGCTCTGGAC

TA\_229644

CTCAATCGAGAAGACGAGCAGTGTGCCGGGCCCCGTAACTCCTTGCGCGAATCCCCTCTGCTCATGTGCGAAAAGGAGCAGGACGGCAGCTTGTACAATGTGGAGCATCGAGAGGAACGCAGGAGAGTCTTTTGGCTTCTGTACGCTCTGGAT

TLONGI\_14376

CTCAACCGGGAGGATGAGCAGTGCGCCGGGCCCCGTAACGCCTTGCGCAAACCCCTCTCTGCTCATGTGCGTAAGGAGCAGGATGGCAGCCTGTATAACCTCGAGCTGCGAGAAGAGCGCCGGCGGGTCTTTTGGCTTCTCTATGCCCTGGAT

TR\_60282

CTCAACCGAGAGGACGAGCAATGCGCCGGACCCGTGACGCCCTGCGCGAATCCTCTCTGCTCGTGTGCGAAAAGAGCAGGATGGTAGCTTGTACAATCTCGAGCTGCGAGAAGAGCGCCGGCGAGTCTTTTGGCTTCTCTATGCCTTGGAC

TRICITRO\_110

CTGCAACCGGGAGGATGAACAGTGCGCCGGGCCCCGTAACGCCGTGCGCAAACCCCTCTGCTCATGTGCGAAAAGAGCAAGATGGTAGTCTGTATAATCTCGAGCTGCGAGAAGAGCGCCGAAGAGTCTTTTGGCTTCTCTATGCCCTGGAC

THZ\_79686

CTACACCGAGAGGACGAGCAATGTGCCGGGCCTGTGACGCCGTGCGCAAACCCCCTTTGCTCGTGCAAAAAGACCAAGATGGCAGCATATATAACTTGGAGCTACGAGAAGAGCGTCGAAGAGTCTTTTGGCTTCTCTACGCTCTGGAT

TH\_701679

CTACACCGAGAGGACGAGCAATGTGCCGGGCCTGTGACGCCGTGCGCAAACCCCCTTTGCTCGTGCAAAAAGACCAAGATGGCAGCATATATAACTTGGAGCTACGAGAAGAGCGTCGAAGAGTCTTTTGGCTTCTCTACGCTCTGGAT

A0A1T3C8Z2

CTACACCGAGAGGATGAGCAATGTGCCGGACCTGTGACCCCTTGCGCAAACCCCCTTTGCTCATGCAAAAAGGATCAAGATGGCAGCATATATAACTTGGAGCTACGAGAAGAGCGCCGAAGAGTCTTTTGGCTTTTATACGCCCTGGAT

TGAM\_8287

CTCAATCGAGAAGACGAGCAATGCGCTGGACCCGTAACTCCTTGTGCAAATCCTCTTTGTTTCATGCCGAAAGGAGCAGGATGGCAGCTTGTACAATCTGGAGCATCGTGAGGAACGCAGGAGAGTCTTTTGGCTTCTGTACGCTCTGGAT

OPB37586

CTACACCGAGAGGATGAGCAATGTGCCGGACCTGTGACCCCTTGCGCAAACCCCCTTTGCTCATGCAAAAAGGATCAAGATGGCAGCATATATAACTTGGAGCTACGAGAAGAGCGCCGAAGAGTCTTTTGGCTTTTATACGCCCTGGAT

cDNA OPB3758

CTACACCGAGAGGATGAGCAATGTGCCGGACCTGTGACCCCTTGCGCAAACCCCCTTTGCTCATGCAAAAAGGATCAAGATGGCAGCATATATAACTTGGAGCTACGAGAAGAGCGCCGAAGAGTCTTTTGGCTTTTATACGCCCTGGAT

cDNA Xlr2\*

CTCAATCGAGAGGATGAACAATGTGCCGGACCTGTGACACCATGTGCAAACCCCCTTTGCTCGTGCAAAAAGGACCAAGATGGCAGCATATACAATATGGAGTTACGGGAAGAACGCCGGAGAGTCTTTTGGCTGCTCTACGCCTTGGAT

18801890190019101920193019401950196019701980

\*

\*

\*

\*

\*

\*

\*

\*

\*

\*

\*

Xlr2

CGCCATCTAGCCTTGTCTTTCAACTCGGCTCTAACGATACCCGATTCACTACTGCGAAGTTTATTGTTAGT--A--T--A--C--CA-A--T----T--CGTT-C--T-TGA-CTG-GCTT-T-----TGTT---CTAACTT-T--T--G-

Xlr2-000202

CGCCATCTAGCCTTGTCTTTCAACTCGGCTCTAACGATACCCGATTCACTACTGCGAAGTTTATTGTTAGT--A--T--A--C--CA-A--T----T--CGTT-C--T-TGA-CTG-GCTT-T-----TGTT---CTAACTT-T--T--G-

TAS\_375582

AGGCATCTGGCTTTGTCTTTTCAACTCGGCTTTGACAATCCCCGATTCTTACTGTGAAGTTTATTGTAAGTGA--CTGA--G--TA-A--C----C--CATT-C--TGCTT-TTGTGCTTGA-----TTAA---CCAACCT-T--T--G-

TA\_229644

CGGCATCTGGCCTTGTCTTTTCAACTCGGCGTTGACGATACCTGATTCTTACTGCGAAGTCTATTGTAAGTA-AC TT--AGGC--TA-A--GTAAT--TGTTAA--TATGT-TCT-GCTT-T-----CGTTAAACTAAC-C-C--T--G-

TLONGI\_14376

CGGCATTTGGCCTTGTCTTTTCAACTCTGCTCTCACAATCCCTGACTCGTACTGTGAGTTTACTGTAAGT--A--T-----C--CA-A-----G--CCTG-C--T-TCA-GCA-GCTTCT-----TCTT---CACTCTT-T--CTAA-

TR\_60282

CGGCACCTGGCCCTGTCTTTTCAACTCTGCCCTTACCATCCCTGACTCGTACTGCGAAGTCTACTGTAAGG--A--C--C--A--AA-A--C-----C--TGCC-C--C-CAATCTG-TTCA-T-----TGTC---CACCTT-TGCT--GA

TRICITRO\_110

CGGCACCTGGCCTTGTCTTTTCAACTCTGCTCTCACAATTCCTGACTCGTACTGCGAAGTTTACTGTAAGT----T--T--C--CA-AACA----T--TGCT-C--T-AAC-CTGTTTCT-T-----TGATTA-CTCCCTTCT--A--A-

THZ\_79686

CGCCATCTAGCCTTGTCTTTTCAACTCGGCTCTAACAATACCCGACTCTTATTGCGAAGTTTATTGTAAGT--A--T--A--C--TATA--TGA--TG-CCTC-CAGC-TTA-TTG-ACTG-G-----CCTTG--CTAA-TT-C--T--G-TH\_701679

CGCCATCTAGCCTTGTCTTTTCAACTCGGCTCTAACAATACCCGACTCTTATTGCGAAGTTTATTGTAAGT--A--T--A--C--TATA--TGA--TG-CCTC-CAGC-TTA-TTG-ACTG-G-----CCTTG--CTAA-TT-C--T--G-

A0A1T3C8Z2

CGCCATCTAGCTTTGTCTTTTCAACTCGGCTCTAACAATACCTGACTCTTATTGTGAAGTTTATTGTAAGC--A--T--A--C--TA-T--G----T--TGTG-CC-T-TCA-CCC-TCCG-ACCAACTGTTG--CTAA-TT-C--T--A-

TGAM\_8287

CGGCATCTGGCCTTGTCTTTTCAACTCGGCGCTGACAATACCTGATTCACTACTGCGAAGTCTATTGTAAGT--ACCT--AG-ACTGA-A--TG---ATCCGTT-C--T-G---CTT-TC-C-A-----TAAA---CTAAC-C-T--T--G-

OPB37586

CGCCATCTAGCTTTGTCTTTTCAACTCGGCTCTAACAATACCTGACTCTTATTGTGAAGTTTATTGTAAGC--A--T--A--C--TA-T--G----T--TGTG-CC-T-TCA-CCC-TCCG-ACCAACTGTTG--CTAA-TT-C--T--A-

cDNA OPB3758

CGCCATCTAGCTTTGTCTTTTCAACTCGGCTCTAACAATACCTGACTCTTATTGTGAAGTTTATT-----

cDNA Xlr2\*

CGCCATCTAGCCTTGTCTTTTCAACTCGGCTCTAACGATACCCGATTCACTACTGCGAAGTTTATT-----

Intron 4

199020002010202020302040205020602070208020902100211021202130

\*

\*

\*

\*

\*

\*

\*

\*

\*

\*

\*

\*

\*

\*

Xlr2

-C--T--C--TCAGCTCCGCTACCTGAAGCTGTTTGGGAAAACCTTGATACAATCCCGCCAGCGAAATCCCGCTCGAAGGATCGGACCGCCAACTACCGCCTCTGGATCTGCCTTTTTTTGAATACTTTTTGCCCTCATGGCGATACT

Xlr2-000202

-C--T--C--TCAGCTCCGCTACCTGAAGCTGTTTGGGAAAACCTCGATACAATCCCGCCAGCGAAATCCCGCTCGAAGGATCGGACCGCCAAACACCGCCTCTGGATCTGCCTTTTTTTGAATACTTTTTGCCCTCATGGCGATACT

TAS\_375582

-C--A--A--CCAGCCCCCTCTGCCTGAAGCTGTTTGGGAAAACCTCGACACAATTCCCTCCAAACGAGATTCCCGTTTCGAACAATTGGACCACCAACGACTGCCTCCGGATCTGCCTTTTTTCGAATACTTCTTACCCTCATGGCTATACT

TA\_229644

-T--T--CA-TCAGCCCCCTACCTGAAGCTATTTGGGAGAATCTCGACACCATTCCTCCCAACGAGATGCCCGTTTCGACCATTTGGACCGCCAACACGGCCTCTGGATCTGCCTTTTTTCGAATACTTTTTTGCCACTCATGGCTATACT

TLONGI\_14376

-CA-A--GCTTCAGCCCCGCTTCCTGAAGCCATATGGGAGAACCTCGACACGATCCCACCCAGCGAAATCCCGCTCGAAGAATAGGACCGCCAACGACTGCCTCTGGATCTGCCTTTTTTTGAGTACTTCTTACCTCTCATGGCGATACT

TR\_60282

CCGGC--C--TCAGCACCTCTTCCCGAAGCCATCTGGGAGAACCTCGACACGATTTTCGCCAGTGAGATTCCCGCCCCGAAGAATCGGACCGCCCACGACTGCCTCTGGATCTGCATTTTTTCGAGTACTTTTTACCCTCATGGCGATACT

TRICITRO\_110

-C--TGACT-TCAGCCCCCTCCCCGAAGCCATCTGGGAAAACCTCGACACGATCCCACCCAGCGAGATTCTTGCCCGAACAATCGGACCGCCGACGACTGCCTCTGGGTCTGCATTTTTTTGAGTACTTTCTACCCTCATGGCGATACT

THZ\_79686

-C--T--C--TTAGCCCCGTTGCCTGAAGCTGTTTGGGAAAACCTCGATACAATCCCACCTAGCGAAATCCCGCCCCGAAGGATCGGACCGCCAACGACTGCCTCTGGGTCTGCCTTTTTTCGAATACTTTTTTGCCACTCATGGCCATACT

TH\_701679

-C--T--C--TTAGCCCCGTTGCCTGAAGCTGTTTGGGAAAACCTCGATACAATCCCACCTAGCGAAATCCCGCCCCGAAGGATCGGACCGCCAACGACTGCCTCTGGGTCTGCCTTTTTTCGAATACTTTTTTGCCACTCATGGCCATACT

A0A1T3C8Z2

-C--T--C--TCAGCCCCGTTGCCTGAAGCTGTTTGGGAAAACCTCGATACAATCCCACCCAGCGAAATCCCGCTCGAAGGATCGGACCGCCAACGACTGCCTCTGGGTCTGCCTTTTTTCGAATACTTTTTTGCCGCTCATGGCGATACT

TGAM\_8287

-T--T--CA-TCAGCCCCCTACCTGAAGCTGTTTGGGAAAATCTCGACACCATTCCTCCCAACGAGATGCCCGTTTCGAACCATTTGGACCACCAACAACAGCCTCTGGATCTGCCTTTTTTCGAATATTTCTTACCCTCATGGCTATACT

OPB37586

-C--T--C--TCAGCCCCGTTGCCTGAAGCTGTTTGGGAAAACCTCGATACAATCCCACCCAGCGAAATCCCGCTCGAAGGATCGGACCGCCAACGACTGCCTCTGGGTCTGCCTTTTTTCGAATACTTTTTTGCCGCTCATGGCGATACT

cDNA OPB3758

-----CCCCGTTGCCTGAAGCTGTTTGGGAAAACCTCGATACAATCCCACCCAGCGAAATCCCGCTCGAAGGATCGGACCGCCAACGACTGCCTCTGGGTCTGCCTTTTTTCGAATACTTTTTTGCCGCTCATGGCGATACT

cDNA Xlr2\*

-----CTCCGCTACCTGAAGCTGTTTGGGAAAACCTTGATACAATCCCGCCAGCGAAATCCCGCTCGAAGGATCGGACCGCCAACTACCGCCTCTGGATCTGCCTTTTTTTGAATACTTTTTGCCCTCATGGCGATACT

Intron 4



|              |                       |                       |                      |                      |                      |                       |                    |                    |      |      |      |      |      |      |      |
|--------------|-----------------------|-----------------------|----------------------|----------------------|----------------------|-----------------------|--------------------|--------------------|------|------|------|------|------|------|------|
|              | 2140                  | 2150                  | 2160                 | 2170                 | 2180                 | 2190                  | 2200               | 2210               | 2220 | 2230 | 2240 | 2250 | 2260 | 2270 | 2280 |
|              | *                     | *                     | *                    | *                    | *                    | *                     | *                  | *                  | *    | *    | *    | *    | *    | *    | *    |
| Xlr2         | GGGCGACATCATAGAAGTCC  | ACCATAGGCGCCGTCATCCA  | AGGCTTGGAGATCTCGACG  | ATTACATTCTGTAGCTGTTA | TTCAGGGGGCTTCTTTGAC  | CTACGAGATGAGTCTTGCCG  | CGCTTTCGTCGGAGGGTA | ATGACAGCAACAT      |      |      |      |      |      |      |      |
| Xlr2-000202  | GGGCGACATCATAGAAGTCC  | ACCATAGGCGCCGTCATCCA  | AGGCTTGGAGATCTCGACG  | ATTACATTCTGTAGCTGTTA | TTCAGGGGGCTTCTTTGAC  | CTACGAGATGAGTCTTGCCG  | CGCTTTCGTCGGAGGGTA | ATGACAGCAACAT      |      |      |      |      |      |      |      |
| TAS_375582   | AGGAGACATTATAGAAGTCC  | ATCACAGACGCCGCCATCCA  | AAGACTTGGAGATCTGGACG | ATTGCACTCCGTATCTATT  | ATCCAAGGACTACTTACGAC | GTAACGAACTGAGTCTTGCCG | CGCTTTCATCAGAAGGAA | ATGACAACGGCAT      |      |      |      |      |      |      |      |
| TA_229644    | TGGAGACATCATAGAGGTCC  | ATCACAGGCGCCGTCATCCA  | CGGCTCGGAGATTTAGACG  | ATTACACTCCGTGTCTGT   | CATCCAGGGGGCTTCTGACA | ACATACGAACGAGTCTCGCG  | GGCACTCTCGTCAGAA   | GGCAACGACAGTGGCAT  |      |      |      |      |      |      |      |
| TLONGI_14376 | AGGCGACATCATCGAAGTCC  | ATCATCGGCGCCGTCACCCG  | AGACTCGGAGGTCTCGACG  | ACTCACACTCCGTGGCCGT  | CATTAGGGGGCTGCTTTGAC | CTACGAAATGAGTCTCGCCG  | CGCTTTCGCCCGACGGC  | GATGACAACGGCAC     |      |      |      |      |      |      |      |
| TR_60282     | AGGCGACATTATAGAGGTCC  | ATCATCGGCGCCGTCACCCG  | AGACTCGGAGGCCTCGACG  | ATTACACTCCGTGGCCGT   | CGTTAGGGGGCTGCTTTG   | GCCTACGAAATGAGTCTCG   | CCGCGCTGTACCAGACG  | GGCGACGACAACGGCAC  |      |      |      |      |      |      |      |
| TRICITRO_110 | GGGCGACATCATAGAAGTTCA | TATCATCGGCGCCGTCATCCG | AGACTCGGAGGCCTCGACG  | ATTACACTCTGTAGCCGTA  | ATCCAGGGGACTGCTTTGAC | CTACGAGTTGAGTCTCGCCG  | CGCTTTCACCAGACGGC  | GACGACAACGGCAC     |      |      |      |      |      |      |      |
| THZ_79686    | GGGCGACATTATCGAAGTCC  | ACCACAGACGCCGTCATCCA  | AAGACTGGCAGGTCTCGAC  | GACTCGCACTCTGTAGCCG  | TATCCAGGAGCTCCTTTCC  | ACCTACGAGCTCAGTCTTG   | CCGCTCTTTACCAGAGAG | CAATGATAACAACAC    |      |      |      |      |      |      |      |
| TH_701679    | GGGCGACATTATCGAAGTCC  | ACCACAGACGCCGTCATCCA  | AAGACTGGCAGGTCTCGAC  | GACTCGCACTCTGTAGCCG  | TATCCAGGAGCTCCTTTCC  | ACCTACGAGCTCAGTCTTG   | CCGCTCTTTACCAGAGAG | CAATGATAACAACAC    |      |      |      |      |      |      |      |
| A0A1T3C8Z2   | GGGTGACATTATAGAAGTCC  | ACCACAGGCGCCGTCATCCA  | AAGACTGGCAGGTCTCGAC  | GACTCGCACTCTGTAGCCG  | TATCCAGGAACTCCTTTCC  | ACCTACGAGCTCAGTCTTG   | CCGCTCTTTGCCAGAGAG | CAATGATAGCAGCAC    |      |      |      |      |      |      |      |
| TGAM_8287    | AGGAGACATCATAGAGGTTC  | ATCACAGGCGCCGTCACCC   | ACGCCTTGGAGATTTAGACG | ATTACACTCCGTGTCTGT   | CATCCAAGGGGCTTCTCACA | ACATACGAATTGAGTCTCG   | CGGCACTCTCGTCAGA   | AGGCAACGACAGCGGCAT |      |      |      |      |      |      |      |
| OPB37586     | GGGTGACATTATAGAAGTCC  | ACCACAGGCGCCGTCATCCA  | AAGACTGGCAGGTCTCGAC  | GACTCGCACTCTGTAGCCG  | TATCCAGGAACTCCTTTCC  | ACCTACGAGCTCAGTCTTG   | CCGCTCTTTGCCAGAGAG | CAATGATAGCAGCAC    |      |      |      |      |      |      |      |
| cDNA OPB3758 | GGGTGACATTATAGAAGTCC  | ACCACAGGCGCCGTCATCCA  | AAGACTGGCAGGTCTCGAC  | GACTCGCACTCTGTAGCCG  | TATCCAGGAACTCCTTTCC  | ACCTACGAGCTCAGTCTTG   | CCGCTCTTTGCCAGAGAG | CAATGATAGCAGCAC    |      |      |      |      |      |      |      |
| cDNA Xlr2*   | GGGCGACATCATAGAAGTCC  | ACCATAGGCGCCGTCATCCA  | AGGCTTGGAGATCTCGACG  | ATTACATTCTGTAGCTGTTA | TTCAGGGGGCTTCTTTGAC  | CTACGAGATGAGTCTTGCCG  | CGCTTTCGTCGGAGGGTA | ATGACAGCAACAT      |      |      |      |      |      |      |      |

|              |                    |                    |                  |                   |                  |                   |                  |                 |                  |         |      |      |      |      |
|--------------|--------------------|--------------------|------------------|-------------------|------------------|-------------------|------------------|-----------------|------------------|---------|------|------|------|------|
|              | 2290               | 2300               | 2310             | 2320              | 2330             | 2340              | 2350             | 2360            | 2370             | 2380    | 2390 | 2400 | 2410 | 2420 |
|              | *                  | *                  | *                | *                 | *                | *                 | *                | *               | *                | *       | *    | *    | *    | *    |
| Xlr2         | AATACCTCTCCCTATTCA | CACCCCCAAAGGCATTG  | TGTGCTGGAATGCCTT | CAAGGC---CCT--C-- | CAT-C-TCTCACCCGC | ACCCATCATCTGCAGCG | CCCATACAATGCGGGT | GATCCTTCCAAGATG | CGGGCTCGCAAAAGC  | CTATAG  |      |      |      |      |
| Xlr2-000202  | AATTCCCCTCCCTATTCA | CACCCCCAAAGGCATTG  | TGTGCTGGAATGCCTT | CAAGGC---CCT--C-- | CAT-C-TCTCACCCGC | ACCCATCATCTGCAGCG | CCCATACAATGCGGGC | GATCCTTCCAAGATG | CGGGCTCGCAAAAGC  | CTATAG  |      |      |      |      |
| TAS_375582   | AGTTTCCCTGCCTATCC  | ACACTCCAAAGGGCATG  | GTTGCCGGCATGCCGT | CGAGGTCATCCATGTCT | CATCCATCTCATCCAT | ACCCACCTTCTACAGCG | CCCATACAACGCGAG  | GTGATCCCTCCAAG  | ATGCGCCTAGCCAAGG | CCTATAG |      |      |      |      |
| TA_229644    | AGTTCCCCTGCCCATCC  | ACACGCCAAGGGGCATG  | GTCGCCGGCATGCCTT | CGCGGT---CAT--C-- | CAT-G-TCCCATCCGT | ATCCGCCCTCCACAGCG | CCCATACAACGCAAG  | CGATCCGTCCAAG   | ATGCGCCTCGCCAAGG | CCTACAG |      |      |      |      |
| TLONGI_14376 | AATGCCTCTGCCGATTCA | CACACCCCAAGGGAATAG | CTTCTGGAATGCCTT  | CCAGGC---CGT--C-- | CAT-T-TCCCATCCAC | ACCCGTC---CGCAGCT | CCGTACAATGCAAGG  | CGATCCCTCGAAG   | ATGCGACTGGCAAAGG | CCTATAG |      |      |      |      |
| TR_60282     | CATGCCCTGCCTATTCA  | CACACCCCAAGGGATCG  | TTGCCGGAATGCCTT  | CCAGGC---CAT--C-- | CAT-T-TCCCATCCAC | ACCCGTC---CGCAGCC | CTTACAACGCAAGG   | CGATCCCTCCAAG   | ATGCGGCTGGCAAAGG | CCTATAG |      |      |      |      |
| TRICITRO_110 | CATGCCCTGCCTATTCA  | CACACCCCAAGGGATG   | CTTGCCGGAATGCCTT | CCAGGC---CAT--C-- | CAT-T-TCCCATCCAC | ACCCGTC---CGCAGCC | CTTACAACGCAAGG   | CGATCCCTCCAAG   | ATGCGGCTGGCAAAGG | CCTATAG |      |      |      |      |
| THZ_79686    | CATGCCTTTGCCTATCC  | ATACCCCAAGGGGCATG  | CTCGCCGGAATGCCTT | CGAGGC---CAT--C-- | CAT-C-TCTTATCAGC | ACCCGCCCTCTGCAGCT | CCATAACAACGCAAG  | TGACCCTTCCAAG   | ATGCGGCTAGCAAAGG | CCTATAG |      |      |      |      |
| TH_701679    | CATGCCTTTGCCTATCC  | ATACCCCAAGGGGCATG  | CTCGCCGGAATGCCTT | CGAGGC---CAT--C-- | CAT-C-TCTTATCAGC | ACCCGCCCTCTGCAGCT | CCATAACAACGCAAG  | TGACCCTTCCAAG   | ATGCGGCTAGCAAAGG | CCTATAG |      |      |      |      |
| A0A1T3C8Z2   | CATGCCTTTGCCTATCC  | ATACCCCAAGGGCATG   | GTCGCCGGAATGCCTC | CGAGAC---CAT--C-- | CAT-C-TCGCACCAGC | ACCCGCCCTCTGCAGCT | CCATAACAACGCAAG  | CGACCCGTCCAAG   | ATGCGGCTAGCAAAGG | CCTATAG |      |      |      |      |
| TGAM_8287    | CGTTCCCCTGCCCATCC  | ACACGCCAAGGGGCATG  | GTCGCCGGCATGCCTT | CGCGAT---CAT--C-- | CAT-G-TCCCATCCGT | ATCCTCCATCTACAGCG | CCCATACAACGCGAG  | TGATCCGTCCAAG   | ATGCGCCTCGCCAAGG | CCTACAG |      |      |      |      |
| OPB37586     | CATGCCTTTGCCTATCC  | ATACCCCAAGGGCATG   | GTCGCCGGAATGCCTC | CGAGAC---CAT--C-- | CAT-C-TCGCACCAGC | ACCCGCCCTCTGCAGCT | CCATAACAACGCAAG  | CGACCCGTCCAAG   | ATGCGGCTAGCAAAGG | CCTATAG |      |      |      |      |
| cDNA OPB3758 | CATGCCTTTGCCTATCC  | ATACCCCAAGGGCATG   | GTCGCCGGAATGCCTC | CGAGAC---CAT--C-- | CAT-C-TCGCACCAGC | ACCCGCCCTCTGCAGCT | CCATAACAACGCAAG  | CGACCCGTCCAAG   | ATGCGGCTAGCAAAGG | CCTATAG |      |      |      |      |
| cDNA Xlr2*   | AATACCTCTCCCTATTCA | CACCCCCAAAGGCATTG  | TGTGCTGGAATGCCTT | CAAGGC---CCT--C-- | CAT-C-TCTCACCCGC | ACCCATCATCTGCAGCG | CCCATACAATGCGGGT | GATCCTTCCAAGATG | CGGGCTCGCAAAAGC  | CTATAG  |      |      |      |      |

|              |                    |                   |                    |                  |                   |                   |                  |                  |                |       |      |      |      |      |      |
|--------------|--------------------|-------------------|--------------------|------------------|-------------------|-------------------|------------------|------------------|----------------|-------|------|------|------|------|------|
|              | 2430               | 2440              | 2450               | 2460             | 2470              | 2480              | 2490             | 2500             | 2510           | 2520  | 2530 | 2540 | 2550 | 2560 | 2570 |
|              | *                  | *                 | *                  | *                | *                 | *                 | *                | *                | *              | *     | *    | *    | *    | *    | *    |
| Xlr2         | TACGCACATTCTACACGT | GCTACATGTGCTTCTAC | ACGGCAAATGGGATGCC  | CATATCCATGTTGGAC | GACGGCGACGACTGG   | ATTACGTCCAAGAGATT | CAACGAGTGCGCGTCA | CATGCCATTTCCGCCT | CACAATCGGTCTCG | ACCAT |      |      |      |      |      |
| Xlr2-000202  | TACGCACATTCTACACGT | GCTACATGTGCTTCTAC | ACGGCAAATGGGATGCC  | CATATCCATGTTGGAC | GACGGCGACGACTGG   | ATTACGTCCAAGAGATT | CAACGAGTGCGCGTCA | CACGCCATTTCCGCCT | CACAATCGGTCTCG | ACCAT |      |      |      |      |      |
| TAS_375582   | CACGCATATCCTGCATGT | GCTGCATGTACTCCTAC | ACGGCAAATGGGATGCC  | CATATCCATGTTGGAC | GATGGCGACGATTGG   | ATCACGTCCAAGAGATT | CAACGAATGCGCATCA | CATGCCATTTCTGCTT | CGCAGTCTGTCTCG | ACCAT |      |      |      |      |      |
| TA_229644    | CACGCACATTCTCCATGT | GCTGCATGTGCTCCTCA | CGGCAAATGGGATGCC   | CATATCCATGCTGGAC | GACGGCGATGACTGG   | ATCACATCTAAAGATT  | CAACGAGTGCGCGTCA | CACGCCATTTCTGCGT | CGCAGTCCGTTTCG | ACAAT |      |      |      |      |      |
| TLONGI_14376 | CACGCACATCCTGCACGT | GTTGCATGTACTGCTG  | CACGGAAAATGGGATGCC | ATCTCCATGCTGGAC  | GACGGCGACGATTGG   | ATCACTTCCAAGAGGTT | CAACGAGTGCGCGTCA | CATGCCATCTCTGCGT | CGCAGTCTGTCTCG | ACTAT |      |      |      |      |      |
| TR_60282     | CACGCACATCTTGACGTG | CTGCACGTGCTGCCATG | GAAAAATGGGATGCC    | ATCTCCATGCTGGAC  | GACGGCGACGATTGG   | ATCACGTCCAAGAGTT  | CAACGAATGCGCGTCA | CATGCCATTTCTGCGT | CGCAGTCCGTCTCG | ACTAT |      |      |      |      |      |
| TRICITRO_110 | CACGCATATTCTGCACGT | GCTGCATGTCTTGCTAC | ACGGCAAGTGGGATGCC  | ATCTCCATGCTGGAC  | GACGGCGACGATTGG   | ATCACGTCCAAGAGTT  | TAATGAGTGCGCGTCA | CATGCCATTTCTGCGT | CGCAATCCGTCTCG | ACCAT |      |      |      |      |      |
| THZ_79686    | CACCCACATTCTACACGT | ATTGCATGTGCTTCTG  | CACGGCAAATGGGATG   | CTATATCTATGTTGG  | ACGACGGCGACGATTGG | ATCACGTCCAAGAGATT | CAACGAGTGCGCGTCT | CACGCCATTTCTGCGT | CGCAATCGGTCTCG | ACCAT |      |      |      |      |      |
| TH_701679    | CACCCACATTCTACACGT | ATTGCATGTGCTTCTG  | CACGGCAAATGGGATG   | CTATATCTATGTTGG  | ACGACGGCGACGATTGG | ATCACGTCCAAGAGATT | CAACGAGTGCGCGTCT | CACGCCATTTCTGCGT | CGCAATCGGTCTCG | ACCAT |      |      |      |      |      |
| A0A1T3C8Z2   | CGCTCACATTCTGCACGT | ATTGCATGTGCTTCTAC | ATGGCAAATGGGATG    | CTATATCTATGTTGG  | ACGACGGCGACGATTGG | ATCACGTCCAAGAGATT | CAACGAGTGCGCGTCT | CACGCCATTTCTGCAT | CACAATCCGTCTCG | ACCAT |      |      |      |      |      |
| TGAM_8287    | CACGCATATTCTCCATGT | GCTGCATGTACTCCTG  | CACGGTAAATGGGATGCC | CATATCCATGCTGGAC | GATGGCGATGACTGG   | ATCACATCCAAGAGATT | CAACGAGTGCGCGTCA | CATGCCATTTCTGCGT | CGCAGTCTGTTTCA | ACAAT |      |      |      |      |      |
| OPB37586     | CGCTCACATTCTGCACGT | ATTGCATGTGCTTCTAC | ATGGCAAATGGGATG    | CTATATCTATGTTGG  | ACGACGGCGACGATTGG | ATCACGTCCAAGAGATT | CAACGAGTGCGCGTCT | CACGCCATTTCTGCAT | CACAATCCGTCTCG | ACCAT |      |      |      |      |      |
| cDNA OPB3758 | CGCTCACATTCTGCACGT | ATTGCATGTGCTTCTAC | ATGGCAAATGGGATG    | CTATATCTATGTTGG  | ACGACGGCGACGATTGG | ATCACGTCCAAGAGATT | CAACGAGTGCGCGTCT | CACGCCATTTCTGCAT | CACAATCCGTCTCG | ACCAT |      |      |      |      |      |
| cDNA Xlr2*   | TACGCACATTCTACACGT | GCTACATGTGCTTCTAC | ACGGCAAATGGGATGCC  | CATATCCATGTTGGAC | GACGGCGACGACTGG   | ATTACGTCCAAGAGATT | CAACGAGTGCGCGTCA | CATGCCATTTCCGCCT | CACAATCGGTCTCG | ACCAT |      |      |      |      |      |





**Figure S3.** Alignment of Xlr2 encoding gene orthologs in diverse *Trichoderma* species. The alignment includes cDNA obtained from our *Trichoderma virens* Gv29.8 RNA-seq data (cDNA Xlr2\*, Castañeda-Casasola, Lawry et al., in preparation), predicted mRNA sequences from *T. guizhouense* (cDNA OPB3758) and *T. parareesei* (OTA07803.1), as well as the extended 5’ region of various *Trichoderma* gene orthologs. The presence of the microexon sequence is observed in all Xlr2 orthologs from the *Trichoderma* species analyzed in this study. Introns are indicated by orange bars. The sequence Xlr2-000202 corresponds to the ortholog in *T. virens* FT-333, the gene reported in NCBI corresponds to TrVFT333\_000202. It was obtained from a search using NCBI Blast. The orthologous gene was identified on chromosome 1 (<https://www.ncbi.nlm.nih.gov/nuccore/CP071115.1?from=816716&to=819677>). The correspondence names between this figure and figure 4B is as follow:

| This Figure  | Figure 4B      |
|--------------|----------------|
| Xlr2         | PP712105       |
| Xlr2-000202  | Xlr2-000202**  |
| TAS_375582   | TAS_375582     |
| TA_229644    | Triat2_229644  |
| TLONGI_14376 | Trilo3_1437635 |
| TR_60282     | TRQM6a_60282   |
| TRICITRO_110 | Trici4_1109904 |
| THZ_79686    | Triha1_79686   |
| TH_701679    | Trihar1_701679 |
| A0A1T3C8Z2   | A0A1T3C8Z2     |
| TGAM_8287    | Trigam1_8287   |
| OPB37586     | OPB37586       |
| cDNA OPB3758 | cDNA OPB3758   |
| cDNA Xlr2*   | cDNA PP712105  |

\*\* this is only present in this table and corresponds to TrVFT333\_000202 encoding gene see the figure legend.
