# Supplementary material for: Unveiling a Microexon Switch: Novel Regulation of the Activities of Sugar Assimilation and Plant-Cell-Wall-Degrading Xylanases and Cellulases by Xlr2 in Trichoderma virens
Source: MDPI journal article supplement (doi:10.3390/ijms25105172), 2024-05-09

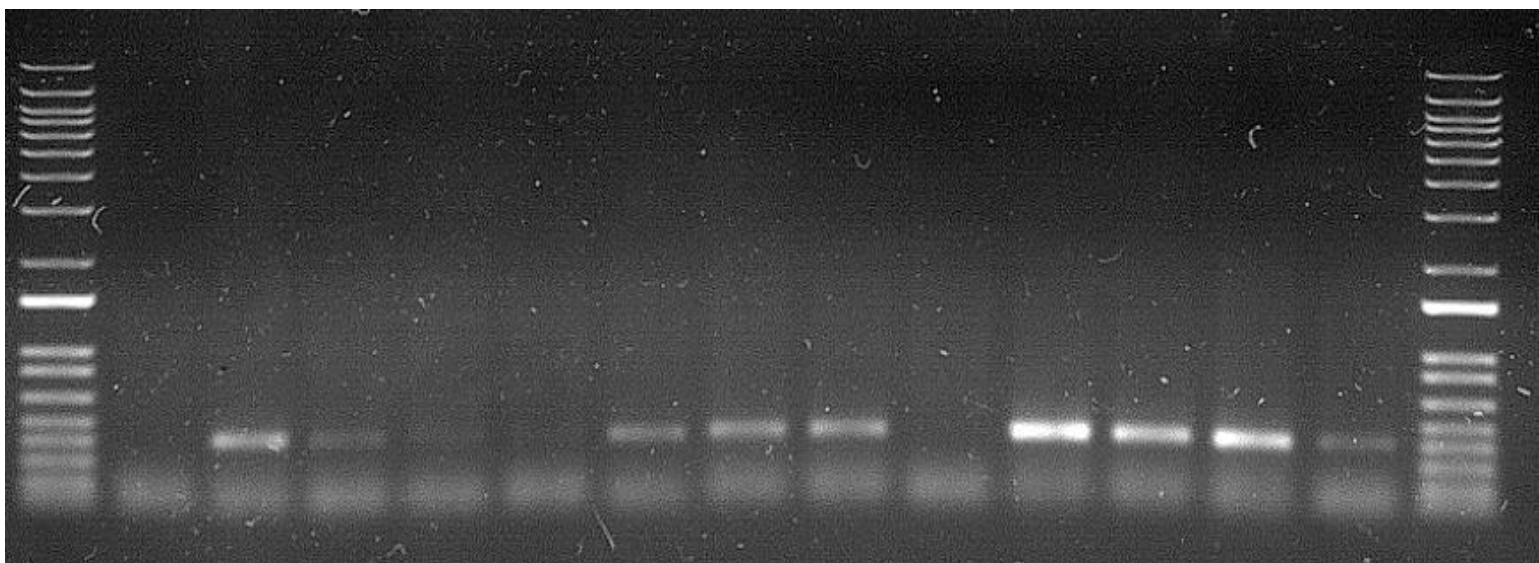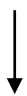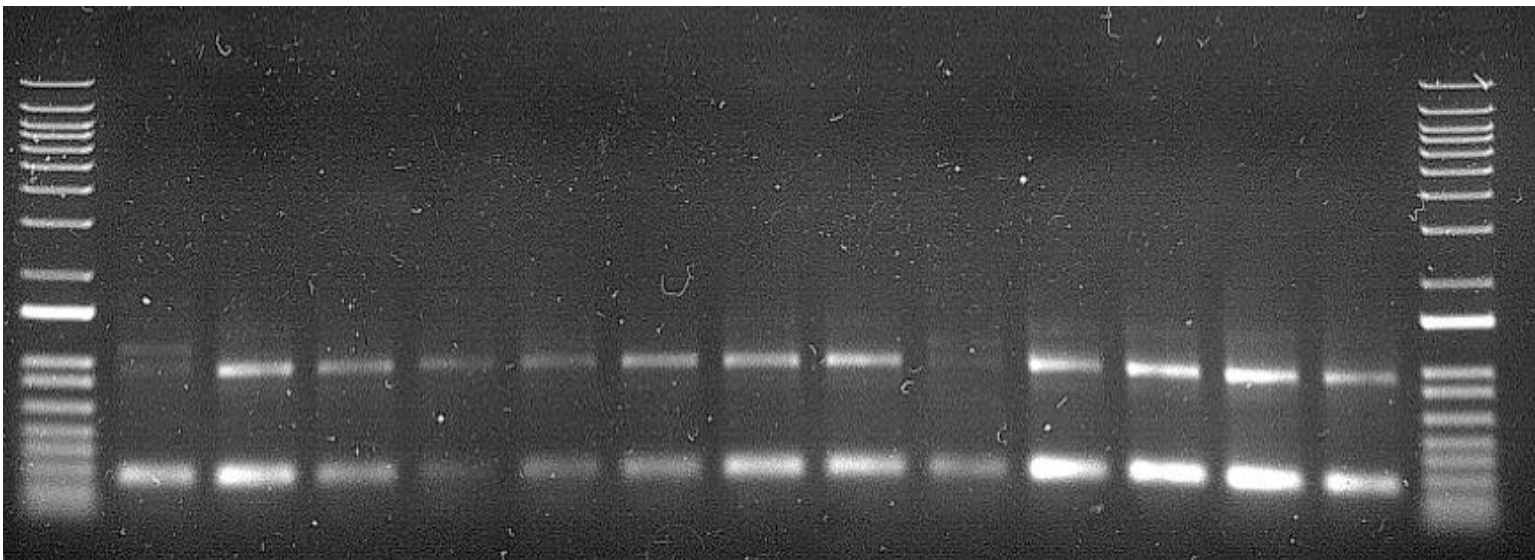



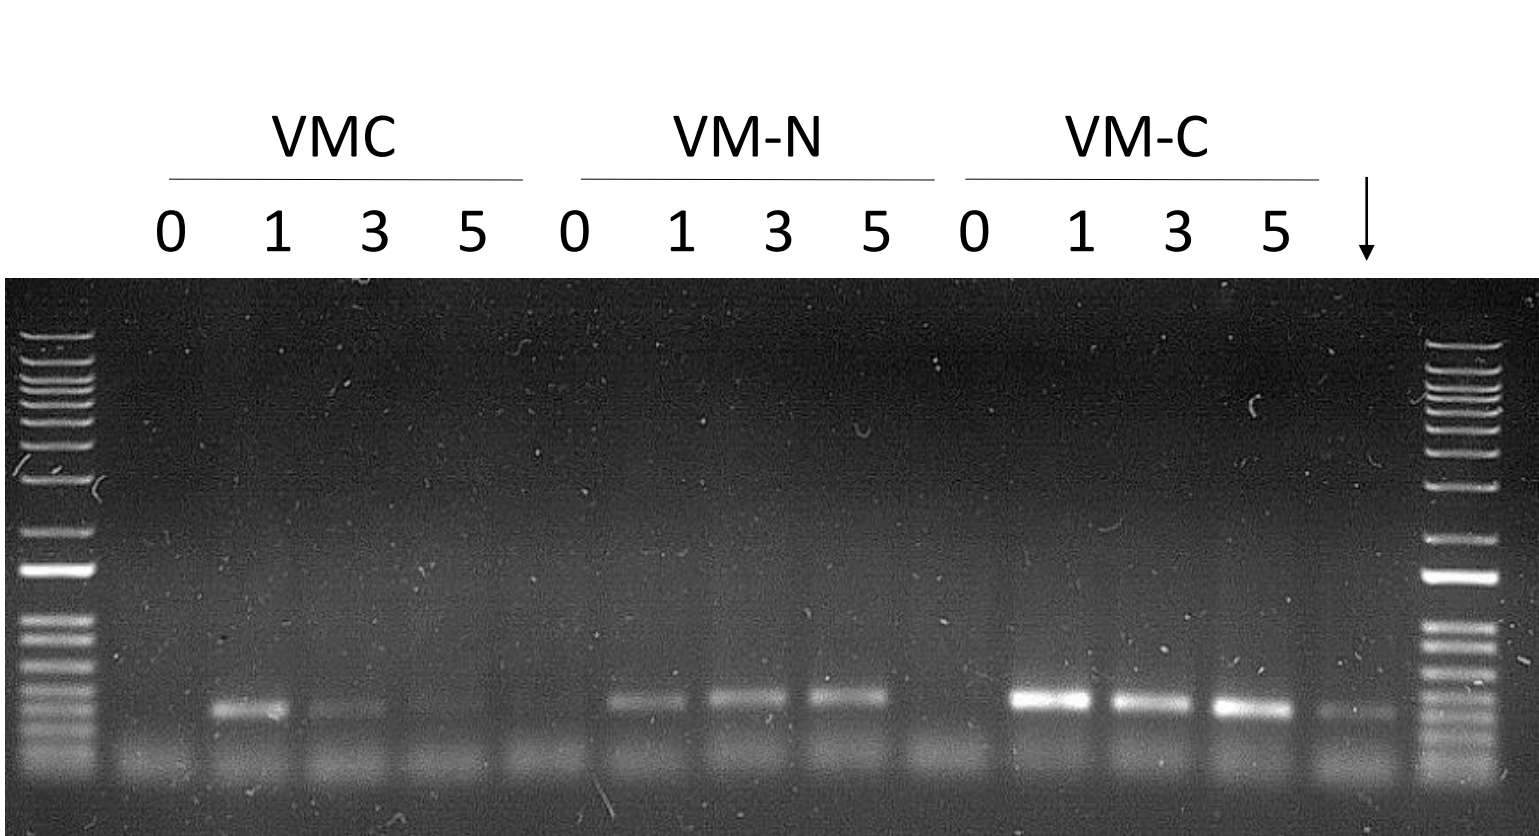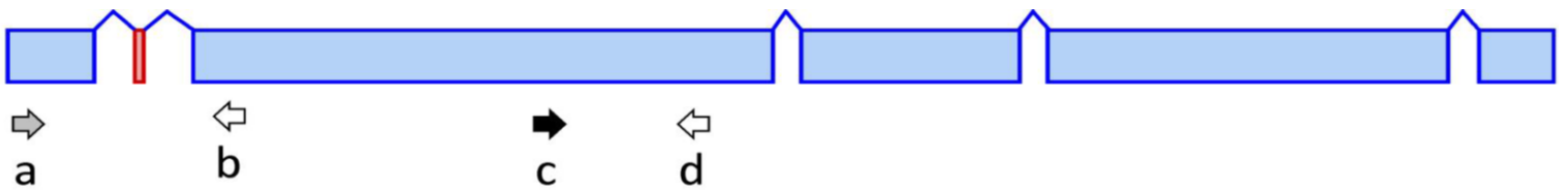

The sample with the arrow was not included in the current study due to correspond To another condition of *Trichoderma* no discussed in the current manuscript

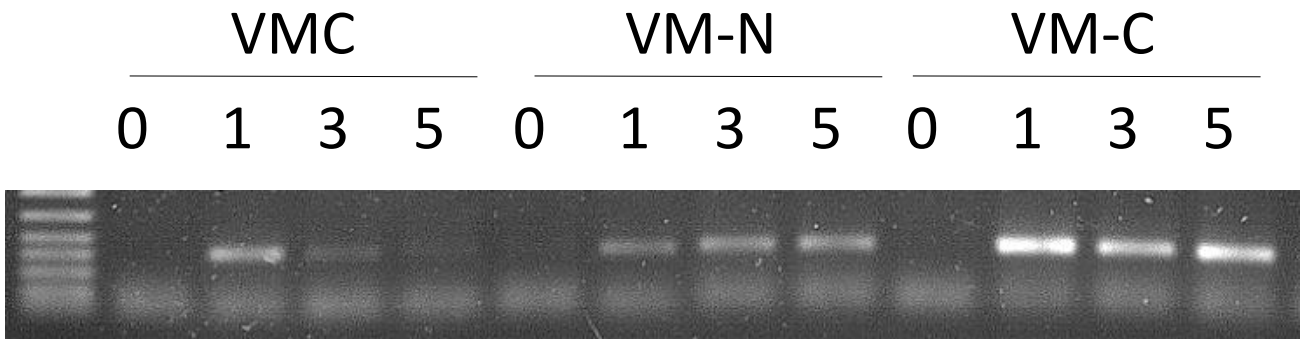

a/b gDNA: 585 bp  
a/b cDNA: 414 bp

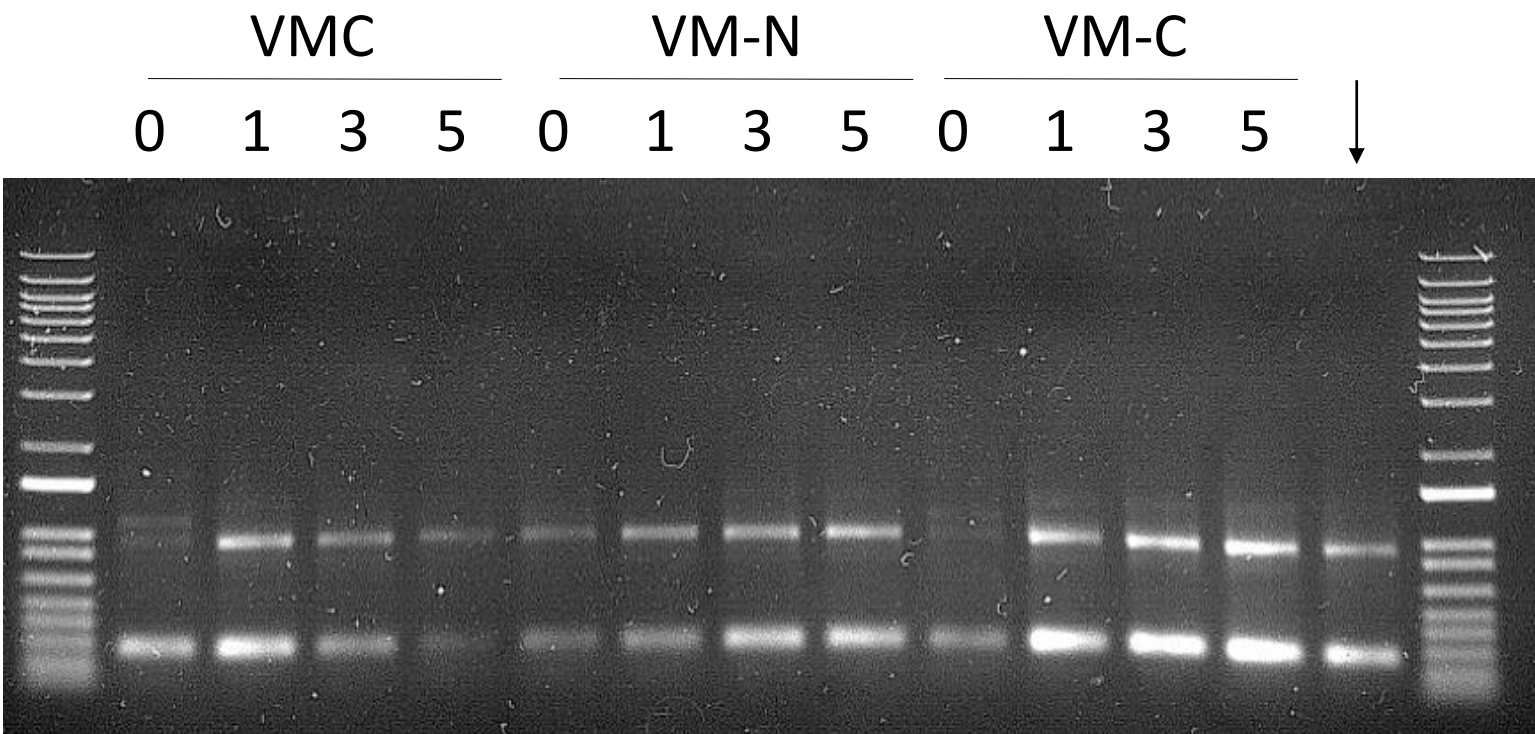

The figure was cut due to we used three primers (a/c/d). To simply the explanation we cut the figure without modifying the interpretation

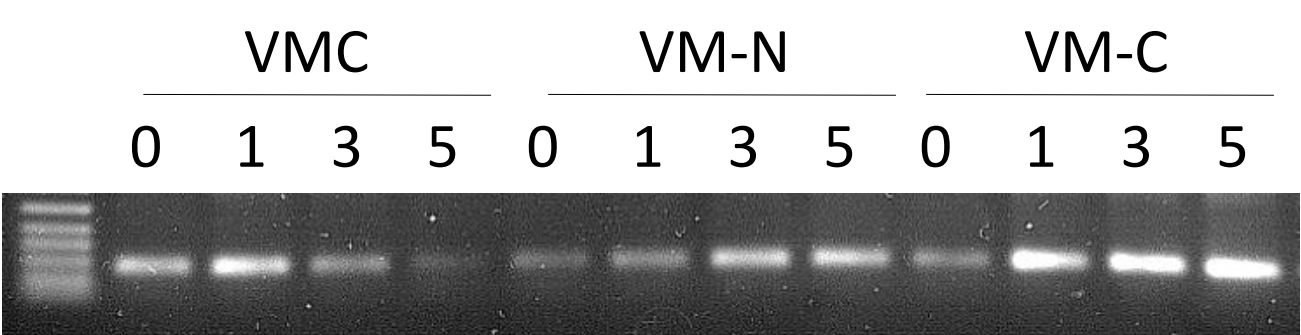

a/d gDNA: 1,110 bp  
a/d cDNA: 940 bp  
  
c/d gDNA: 250 bp  
c/d cDNA: 250 bp



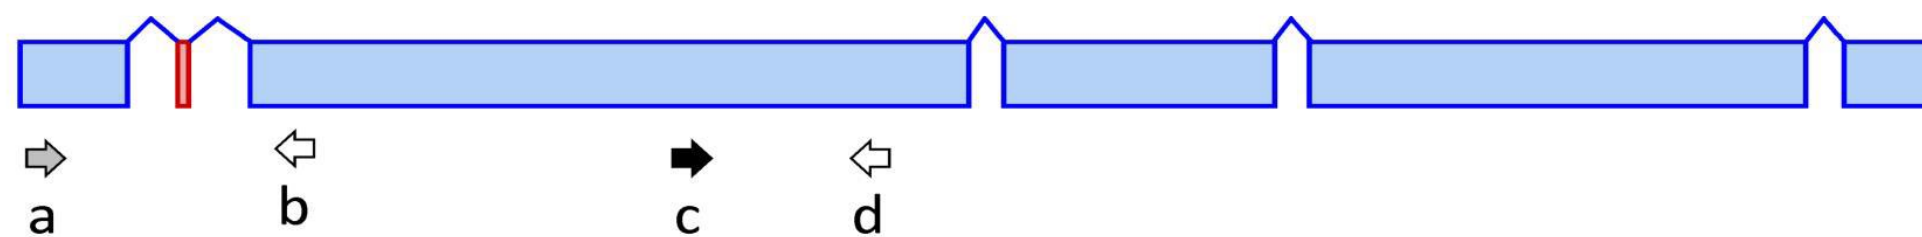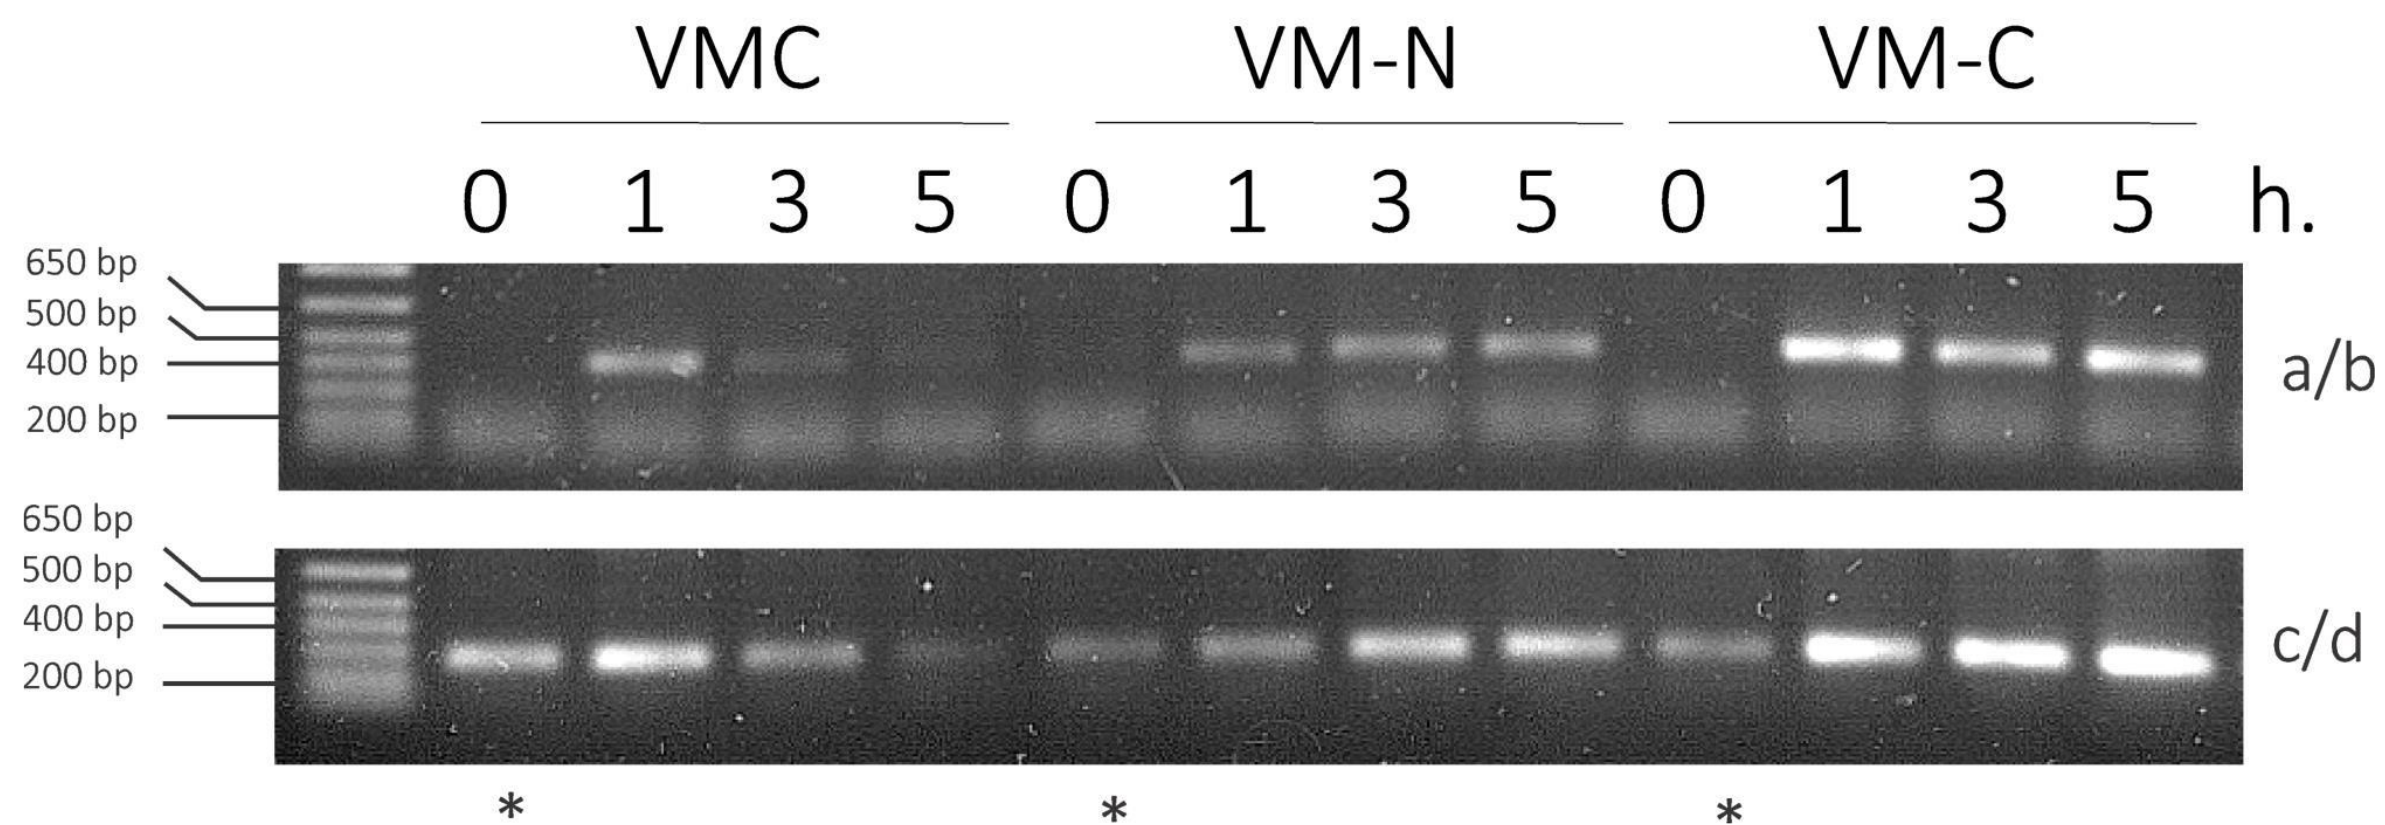

Supplement: s1 [file s1]
