# Supplementary material for: Unveiling a Microexon Switch: Novel Regulation of the Activities of Sugar Assimilation and Plant-Cell-Wall-Degrading Xylanases and Cellulases by Xlr2 in Trichoderma virens
Source: MDPI journal article supplement (doi:10.3390/ijms25105172), 2024-05-09
Supplement: s1 [file s1]

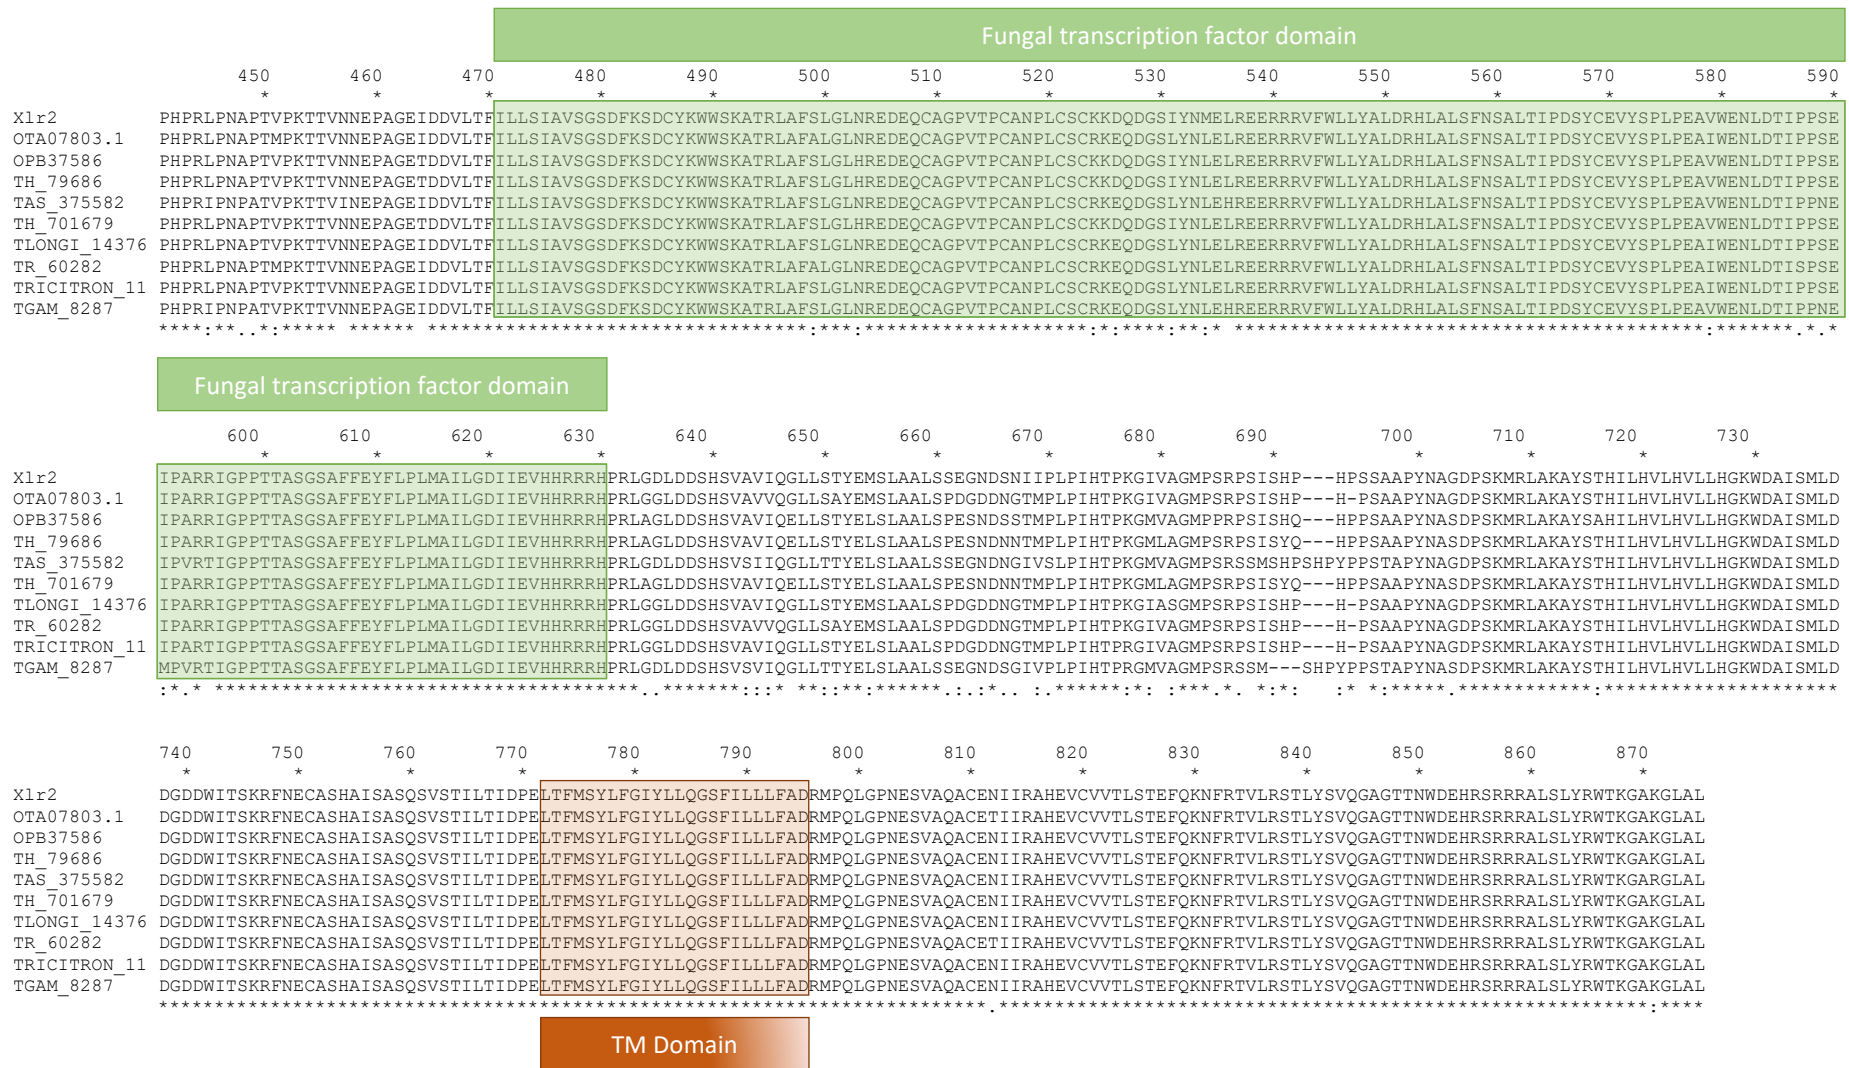

**Figure S4:** Alignment of Xlr2 Similar Proteins from *Trichoderma*. The alignment was done based on manual annotation. The microexon is highly conserved and encodes the amino acid sequence PCRRCE, which includes two cysteines (C) in the Zn(II)2Cys6 domain. Additional domains identified using InterProScan (<https://www.ebi.ac.uk/interpro/search/sequence/>) are indicated in different colours.
