# Supplementary material for: Unveiling a Microexon Switch: Novel Regulation of the Activities of Sugar Assimilation and Plant-Cell-Wall-Degrading Xylanases and Cellulases by Xlr2 in Trichoderma virens
Source: MDPI journal article supplement (doi:10.3390/ijms25105172), 2024-05-09
Supplement: s1 [file s1]

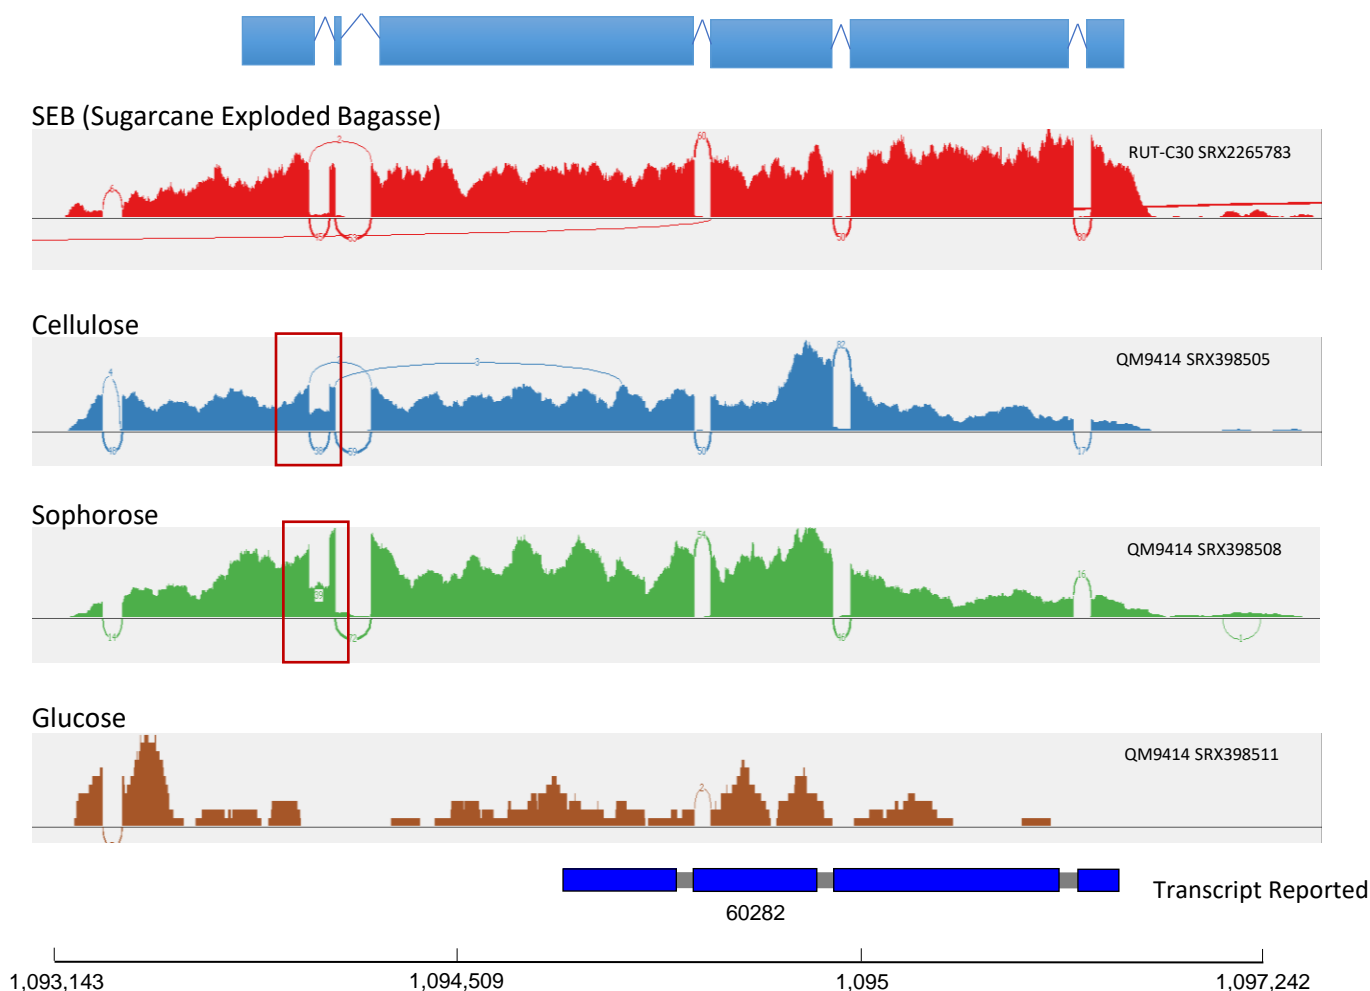

Figure S5. Microexon biology in the ortholog of Xlr2 in *T. reesei*. The partial mapping of publicly available RNA-seq was mapped using Bowtie2 in the Galaxy platform. The mapping of the transcriptome reads from *T. reesei* was visualised using the Integrative Genomics Viewer (IGV) visualization software. [SRX2265783](#): *Trichoderma reesei* RUT-C30 growing on SEB 6h - Replicate 2, [SRX398505](#): GSM1297497: QM9414 Cellulose 1; *Trichoderma reesei*; RNA-Seq, [SRX398508](#): GSM1297500: QM9414 Sophorose 1; *Trichoderma reesei*; RNA-Seq, [SRX398511](#): GSM1297503: QM9414 Glucose 1; *Trichoderma reesei*; RNA-Seq). The first intron not spliced in Cellulose and Sophorose is indicated with a red rectangle. The partial transcript reported in MycoCosm is shown for comparison (<https://mycoCosm.jgi.doe.gov/cgi-bin/dispGeneModel?db=Trire2&id=60282>).
