# Supplementary material for: Unveiling a Microexon Switch: Novel Regulation of the Activities of Sugar Assimilation and Plant-Cell-Wall-Degrading Xylanases and Cellulases by Xlr2 in Trichoderma virens
Source: MDPI journal article supplement (doi:10.3390/ijms25105172), 2024-05-09
Supplement: s1 [file s1]

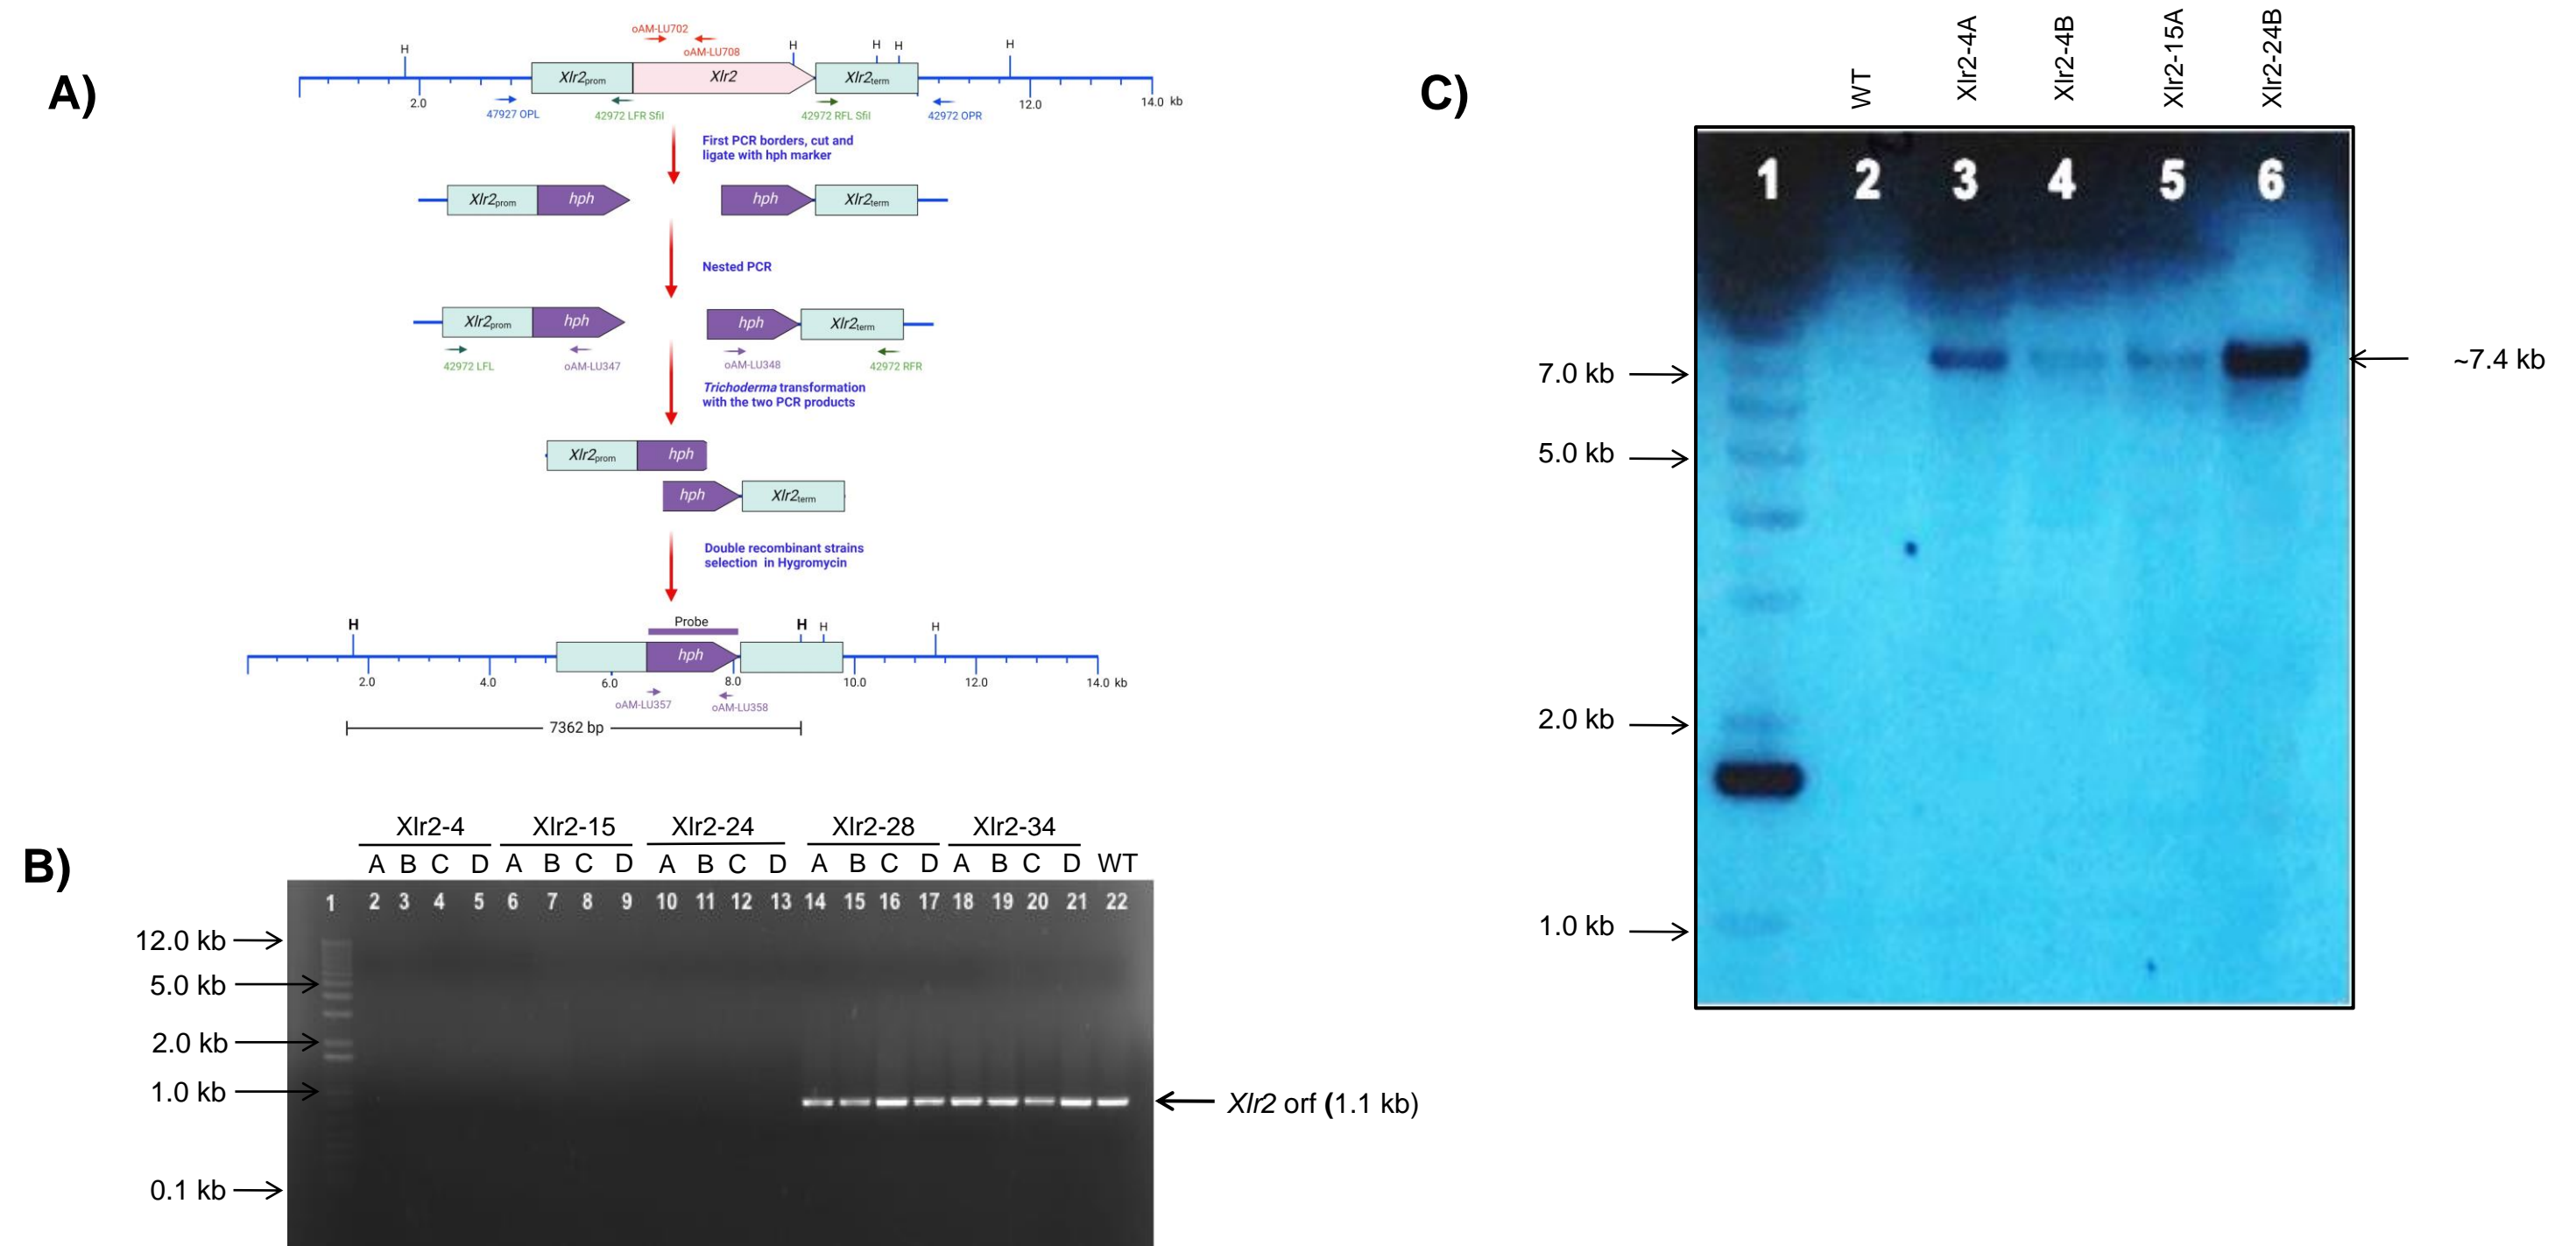

**Figure S1. *Trichoderma virens* Gv29.8 *Xlr2* deletion mutants and selection strategy.** **A)** Diagram of integration events and primer locations. The colours of the primers represent the DNA templates used. **B)** Amplification of *Xlr2* ORF using the oAM-LU702/oAM-LU708 primer mixture and genomic DNA from single isolated strains regenerated on PDA supplemented with 100 µg/ml of hygromycin. Four to six rounds of single spore isolation were performed before DNA isolation. The absence of *Xlr2* was observed in lanes 2 to 13, corresponding to three strains sub-isolated from three individual recombination events. Genomic DNA was used to verify the absence of the *Xlr2* gene. Lane 1: 1 Kb Plus DNA ladder (Invitrogen), Lanes 2-21: candidate *Xlr2* deletion mutant strains, Lane 22: Wild Type (WT) genomic DNA. **C)** A 7.36 kb band, as indicated in A, was identified by Southern blotting, using HindIII-digested genomic DNA from the indicated lines. The Southern blot was probed using an *hph* probe (generated with the primers oAM-LU357 and oAM-LU358) and labelled using the PCR DIG labelling mix system (Roche). Lane 1: Molecular Weight Marker, Lane 2: wild strain, Lane 3: Δ*Xlr2*-4A, Lane 4: Δ*Xlr2*-4B, Lane 5: Δ*Xlr2*-15A, Lane 6: Δ*Xlr2*-24B.
