# Supplementary material for: Unveiling a Microexon Switch: Novel Regulation of the Activities of Sugar Assimilation and Plant-Cell-Wall-Degrading Xylanases and Cellulases by Xlr2 in Trichoderma virens
Source: Int J Mol Sci. 2024 May 9;25(10):5172. doi: 10.3390/ijms25105172 (PMC11121469; doi:10.3390/ijms25105172)
Supplement: Supplementary file 1 [file ijms-25-05172-s001.zip]

Archive with 7 entries (7 files):
- Figure S1 new number.pdf
- Figure S2 new number.pdf
- Figure S3 new number.pdf
- Figure S4 new number.pdf
- Figure S5 new number.pdf
- Figure S6 new number.pdf
- Table S1.docx
